# Supplementary material
Source: publisher figshare collection journal article supplement (https://acs.figshare.com/ndownloader/files/5170585)

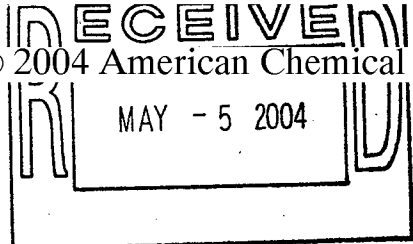

04040036 M

## Supporting Information for

### Intramolecular Iron-Mediated Diene/Olefin Cyclocoupling: Formation of Carbon Spirocycles

Anthony J. Pearson\*, Xiaolong Wang, and Ismet B. Dorange

*Department of Chemistry, Case Western Reserve University, Cleveland, Ohio 44106*

**General procedure for the preparation of homoallylic ketones.** A flame dried round bottom flask was charged with the carboxylic acid complex, and with activated 4 Å molecular sieves (100 mg/mmol acid), then kept overnight under high vacuum (0.5 mmHg). The vacuum was broken with Ar, and then the acid was suspended in freshly distilled  $\text{CH}_2\text{Cl}_2$  under argon. Then, 1.3 equivalents of freshly distilled (from  $\text{CaH}_2$ ) triethylamine were added *via* syringe to the suspension. The yellow solution of alkylammonium salts (soluble in  $\text{CH}_2\text{Cl}_2$ ) was cooled to 0 °C, then 2 equivalents of freshly distilled (from  $\text{P}_2\text{O}_5$ ) methanesulfonyl chloride were added rapidly *via* syringe. The reaction mixture was stirred at 0 °C for 1 h (the reaction can be monitored by IR) under argon. The reaction mixture was then poured into chilled water, the phases were separated and the aqueous phase was extracted three times with  $\text{CH}_2\text{Cl}_2$ . The combined organic layers were washed with 10% aq HCl, and then with sat aq sodium bicarbonate solution, dried ( $\text{MgSO}_4$ ), filtered, and the solvent was evaporated *in vacuo*. The resulting brown viscous oil was placed under high vacuum (0.5 mm Hg) for 2 h, and then dissolved in freshly distilled (from Na/benzophenone) diethyl ether under argon. The solution was cooled to 0 °C, and 1.2 equiv of Grignard reagent was added dropwise over a period of 30 min. The reaction mixture was stirred at 0 °C for further 10 min, then

quenched with sat aq solution of  $\text{NH}_4\text{Cl}$ . The product mixture was partitioned and the aqueous layer was extracted 3 times with diethyl ether. The combined organic phases were washed with sat aq  $\text{NaHCO}_3$ , 10% aq  $\text{HCl}$ , dried ( $\text{MgSO}_4$ ), and concentrated under vacuum. Flash chromatography on silica gel or preparative TLC separation ( $\text{EtOAc/hexanes}$ , 2:8) afforded the desired racemic homoallylic ketone, usually as light brown oil. Deviations from this procedure are noted in the experimental data for the specific compound.

**General procedure for the thermally induced cyclization.** The complex was dissolved in freshly distilled (over sodium) di-*n*-butyl ether under argon. The solution was purged with CO for 1 min, and then refluxed under a balloon of CO for the required time. The cooled product mixture was diluted with ether, filtered through Celite, and concentrated. Flash chromatography or preparative TLC separation ( $\text{EtOAc/hexanes}$ ) yielded the desired product. Deviations from this procedure are noted in the experimental data for the specific compound.

**Tricarbonyl[1-4- $\eta$ -1-(1,3-cyclohexadienyl)-4-penten-1-one]iron (7a).**

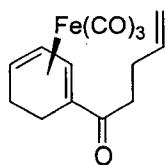

The acid **5** (300 mg, 1.14 mmol) in 3 mL of anhyd  $\text{CH}_2\text{Cl}_2$  was reacted with 0.21 mL of anhyd  $\text{Et}_3\text{N}$  and 0.28 mL of methanesulfonyl chloride to yield 330.4 mg of mixed anhydride as a brown oil. This oil was then treated with 2.9 mL of anhyd  $\text{Et}_2\text{O}$  and 3-butenylmagnesium bromide (1.1 mL, 1.1 M solution in  $\text{Et}_2\text{O}$ ) to yield 260 mg (89% yield) of the title compound as a light brown oil, along with 14 mg of recovered acid complex **5**. IR ( $\text{cm}^{-1}$ , neat): 2058, 1979, 1683.  $^1\text{H}$  NMR (200 MHz,  $\text{CDCl}_3$ ),  $\delta$  6.10 (dd,  $J = 4.8, 1.7$  Hz, 1H),

5.83 (ddt,  $J = 18.0, 10.2, 6.4$  Hz, 1H), 5.41 (ddd,  $J = 6.3, 4.8, 0.9$  Hz, 1H), 5.07 (ddd,  $J = 18.0, 3.3, 1.7$  Hz, 1H), 5.00 (ddd,  $J = 10.2, 3.0, 1.7$  Hz, 1H), 3.40 (dddd,  $J = 6.3, 4.3, 2.5, 1.7$  Hz, 1H), 2.66 (ddd,  $J = 16.8, 8.5, 7.2$  Hz, 1H), 2.60 (apparent dt,  $J = 16.8, 6.9$  Hz, 1H), 2.45-2.30 (2H), 2.18 (ddd,  $J = 14.0, 11.4, 2.9$  Hz, 1H), 1.98 (apparent tt,  $J = 11.4, 4.3$  Hz, 1H), 1.81 (m, 1H), 1.50 (ddd,  $J = 14.0, 8.2, 3.1$  Hz, 1H)  $^{13}\text{C}$  NMR (50 MHz,  $\text{CDCl}_3$ ),  $\delta$  210.3, 204.2, 137.5, 115.2, 87.2, 85.7, 73.1, 63.1, 38.3, 28.1, 25.9, 23.1.

HRMS ( $m/z$ ) for  $\text{M}^+$  ( $\text{C}_{14}\text{H}_{14}\text{FeO}_4$ ): calculated: 302.0241; found: 302.0242.

**Tricarbonyl[1-4- $\eta$ -1-(1,3-cyclohexadienyl)-5-hexen-1-one]iron (7b).**

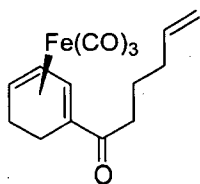

The acid **5** (200 mg, 0.76 mmol) in 2 mL of anhyd  $\text{CH}_2\text{Cl}_2$  was treated with 0.14 mL of  $\text{Et}_3\text{N}$  and 0.89 mL of  $\text{MsCl}$ , then treated with 1.89 mL of  $\text{Et}_2\text{O}$  and 4-pentenylmagnesium bromide (0.76 mL, 1.1 M

solution in  $\text{Et}_2\text{O}$ ) to afford 172 mg of ketone **7b** (87%) as a light brown oil. IR ( $\text{cm}^{-1}$ , neat): 2056, 1991, 1677.  $^1\text{H}$  NMR (200 MHz,  $\text{CDCl}_3$ ),  $\delta$  6.09 (dd,  $J = 4.2, 1.9$  Hz, 1H), 5.80 (apparent ddt,  $J = 17.3, 10.1, 6.0$  Hz, 1H), 5.41 (dd,  $J = 5.0, 4.2$  Hz, 1H), 5.06 (ddd,  $J = 17.3, 3.5, 1.5$  Hz, 1H), 4.98 (ddd,  $J = 10.1, 4.5, 1.5$  Hz, 1H), 3.40 (dddd,  $J = 6.2, 4.2, 2.4, 1.9$  Hz, 1H), 2.52 (ddd,  $J = 17.2, 7.8, 7.0$  Hz, 1H), 2.45 (ddd,  $J = 17.2, 7.6, 6.4$  Hz, 1H), 2.25-1.64 (series of m, 7H), 1.45 (ddd,  $J = 13.4, 7.9, 2.6$  Hz, 1H).  $^{13}\text{C}$  NMR (50 MHz,  $\text{CDCl}_3$ ),  $\delta$  210.3, 204.9, 138.2, 115.2, 87.1, 85.7, 73.3, 63.0, 38.1, 33.1, 25.8, 23.1, 23.0. HRMS ( $m/z$ ) for  $\text{M}^+ - \text{CO}$  ( $\text{C}_{14}\text{H}_{16}\text{FeO}_3$ ): calculated: 288.0405; found: 288.0456.

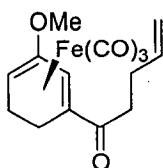

**Tricarbonyl[1-4- $\eta$ -1-(3-methoxy-1,3-cyclohexadienyl)-4-penten-1-one]iron (7c).**

Acid **5** (R = OMe (200 mg, 0.67 mmol) in 1.8 mL of Et<sub>2</sub>O was treated with 125  $\mu$ L of Et<sub>3</sub>N and 170  $\mu$ L of MsCl to afford 0.21 g of mixed anhydride as a brown oil. This oil was then treated with 2 mL of Et<sub>2</sub>O and 3-butenylmagnesium bromide (0.67 mL, 1.1 M solution in Et<sub>2</sub>O) to yield 133.9 mg (72% yield) of the title compound as a yellow solid. Mp 53-55 °C dec. IR (cm<sup>-1</sup>, Et<sub>2</sub>O): 2061, 1978, 1671. <sup>1</sup>H NMR (200 MHz, CDCl<sub>3</sub>),  $\delta$  5.85 (apparent ddt,  $J$  = 17.4, 10.3, 6.6 Hz, 1H), 5.77 (d,  $J$  = 2.3 Hz, 1H), 5.04 (apparent dq,  $J$  = 17.4, 1.4 Hz, 1H), 5.00 (apparent dq,  $J$  = 10.3, 1.4 Hz, 1H), 3.69 (s, 3H), 3.59 (apparent q,  $J$  = 2.6 Hz, 1H), 2.67 (ddd,  $J$  = 17.6, 8.3, 7.4 Hz, 1H), 2.54 (apparent dt,  $J$  = 17.6, 7.0 Hz, 1H), 2.38 (m, 2H), 2.13-1.8 (series of m, 3H), 1.42 (ddd,  $J$  = 11.0, 5.6, 2.4 Hz, 1H). <sup>13</sup>C NMR (50 MHz, CDCl<sub>3</sub>),  $\delta$  206.1, 139.4, 137.5, 115.2, 67.6, 64.0, 55.6, 54.6, 38.9, 28.2, 26.7, 23.1. HRMS ( $m/z$ ) for M<sup>+</sup> (C<sub>15</sub>H<sub>16</sub>FeO<sub>5</sub>): calculated: 332.0347; found: 332.0346.

**Tricarbonyl(6-9- $\eta$ -1-oxo-4-methyl-spiro[4.5]deca-6,8-diene)iron (8a).**

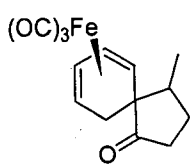

Ketone **7a** (200 mg, 0.66 mmol) dissolved in 35 mL of n-Bu<sub>2</sub>O was heated for 5 h according to the general procedure to yield 188 mg (94% yield, yellow oil) after flash chromatography (1:4/EA:HEX<sup>1</sup>) of the title product as 1.1:1 diastereomer mixture. IR (cm<sup>-1</sup>, neat): 2050, 1962, 1732. <sup>1</sup>H NMR (200 MHz, CDCl<sub>3</sub>), mixture of epimers,  $\delta$  5.54-5.36 (series of m, 3H), 5.24 (ddd,  $J$  = 5.9, 4.1, 1.3 Hz, 1H of one epimer), 3.38 (m, 1H of one epimer), 3.18 (m, 1H of one epimer), 2.91 (dd,  $J$  = 6.4, 1.2 Hz, 1H), 2.64 (dd,  $J$  = 6.6, 1.1 Hz, 1H), 2.33-1.61 (series of m, overlap with other epimer, 7H), 1.08 (d,  $J$  = 7.0 Hz, 3H), 0.86 (d,  $J$  = 7.3 Hz, 3H). <sup>13</sup>C NMR (50 MHz, CDCl<sub>3</sub>), 1:1.1 mixture of stereoisomers,  $\delta$  220.5, 219.9, 211.8, 211.5,

88.9, 86.8, 84.0, 81.6, 63.9, 63.5, 61.5, 59.8, 56.5, 42.8, 40.2, 39.3, 34.6, 33.4, 33.1, 26.2, 25.9, 15.7, 15.5. HRMS ( $m/z$ ) for  $M^+$  ( $C_{14}H_{14}FeO_4$ ): calculated: 302.0241; found: 302.0230.

**Tricarbonyl(6-9- $\eta$ -5-methylspiro[5.5]undeca-7,9-dien-1-one)iron (8b).**

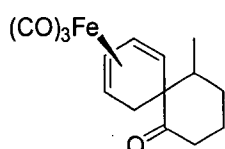

Ketone complex **7b** (101 mg, 0.32 mmol) dissolved in anhyd *n*-Bu<sub>2</sub>O (16 mL) was heated for 7 h according to the general procedure to yield after preparative TLC (1:9/EA:HEX), the title compound as a white solid (60.9 mg, 60% yield), along with 18 mg of recovered starting material (83% yield of conversion), and 5.4 mg (5%) of demetallated spirocompound. Mp 58-60 °C dec. IR (cm<sup>-1</sup>, neat): 2051, 1967, 1710. <sup>1</sup>H NMR (600 MHz, CDCl<sub>3</sub>), First epimer:  $\delta$  5.26 (ddt,  $J$  = 6.6, 4.2, 1.2 Hz, 1H), 5.19 (ddd,  $J$  = 6.0, 4.2, 1.2 Hz, 1H), 3.26 (dtd,  $J$  = 6.6, 3.0, 1.2 Hz, 1H), 3.23 (dd,  $J$  = 6.0, 1.5 Hz, 1H), 2.75 (dd,  $J$  = 6.6, 1.2 Hz, 1H), 2.70-1.40 (series of m, overlap with other epimer, 9H), 0.70 (d,  $J$  = 7.2, 3H). Second epimer:  $\delta$  5.52 (ddd,  $J$  = 6.6, 4.2, 1.8 Hz, 1H), 5.16 (dddd,  $J$  = 6.0, 4.2, 1.8, 1.2 Hz, 1H), 3.02 (dtd,  $J$  = 6.0, 3.0, 1.8 Hz), 2.75 (dd,  $J$  = 6.6, 1.2 Hz), 2.70-1.40 (series of m, overlap with other epimer, 9H), 0.90 (d,  $J$  = 7.2 Hz, 3H). <sup>13</sup>C NMR (50 MHz, CDCl<sub>3</sub>), mixture of regioisomers,  $\delta$  213.0, 211.9, 211.6, 211.5, 89.6, 86.5, 84.4, 80.2, 64.1, 63.8, 61.9, 60.8, 56.6, 54.7, 41.9, 40.4, 40.0, 38.5, 38.3, 35.9, 28.4, 27.3, 22.6, 21.7, 15.7, 14.3. HRMS ( $m/z$ ) for  $M^+$  ( $C_{15}H_{16}FeO_4$ ): calculated: 316.0398; found: 316.0393.

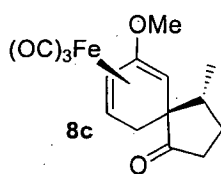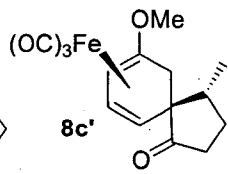

**Tricarbonyl(6-9- $\eta$ -7-methoxy-4-methylspiro[4.5]deca-6,8-dien-1-one)iron (8c/8c')**

A solution of 139 mg (0.42 mmol) of ketone complex **7c** in 25 mL of anhyd *n*-Bu<sub>2</sub>O was refluxed for 5 h according to the general procedure. After workup, spiroketones **8c** and **8c'** were isolated as a 1:1 mixture of regioisomers (brown oil, 125 mg, 90%). Spiroketone **8c** was isolated as a white solid by preparative TLC purification (1:4/EA:HEX). **8c**: Mp 40-45 °C dec. IR (cm<sup>-1</sup>, CH<sub>2</sub>Cl<sub>2</sub>): 2046, 1966, 1737. <sup>1</sup>H NMR (200 MHz, CDCl<sub>3</sub>), δ 5.14 (dd, *J* = 6.6, 1.8 Hz, 1H), 3.71 (s, 3H), 2.91 (d, *J* = 1.8 Hz, 1H), 2.69 (apparent dt, *J* = 6.6, 2.9 Hz, 1H), 2.28-1.83 (series of m, 5H), 1.66 (dd, *J* = 15.0, 3.2 Hz, 1H), 1.49 (dd, *J* = 15.0, 3.1 Hz, 1H), 1.1 (d, *J* = 7.1 Hz, 3H). <sup>13</sup>C NMR (50 MHz, CDCl<sub>3</sub>), δ 221.2, 211.2, 140.5, 67.6, 58.3, 54.8, 53.7, 49.1, 42.4, 39.5, 34.2, 25.7, 15.8. HRMS (*m/z*) for M<sup>+</sup> - CO (C<sub>14</sub>H<sub>16</sub>FeO<sub>4</sub>): calculated: 304.0398; found: 304.0386. **8c'**: <sup>1</sup>H NMR (200 MHz, CDCl<sub>3</sub>), δ 5.43 (d, *J* = 4.3 Hz, 1H), 4.92 (dd, *J* = 6.1, 4.3 Hz, 1H), 3.52 (s, 3H), 2.67 (d, *J* = 6.1 Hz, 1H, H<sub>8</sub>), 2.4-2.1 (series of m, 2H), 1.88 (d, *J* = 14.8 Hz, 1H), 1.70-1.52 (series of m, 2H), 0.90 (d, *J* = 6.9 Hz, 3H). <sup>13</sup>C NMR (50 MHz, CDCl<sub>3</sub>), δ 218.7, 212.2, 119.0, 80.0, 72.8, 65.9, 59.5, 56.5, 55.8, 40.1, 34.7, 26.0, 15.3.

#### 4-Methylspiro[4.5]dec-8-ene-1,7-dione (**9**).

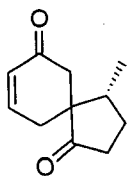

The 1:1 mixture of spirocyclic ketone complexes **8c** (62 mg, 0.18 mmole) was placed under vacuum (0.5 mmHg) for 15 h (overnight). The vacuum was then broken with a flow of Ar, and the spirocyclic ketone complexes were dissolved in anhydrous C<sub>6</sub>H<sub>6</sub> (10 mL). This solution was added via a syringe to a flame dried round bottom flask containing 35 equiv of anhydrous Me<sub>3</sub>NO (536 mg) under Ar. The reaction mixture was stirred at rt under Ar for 16 h (the reaction was monitored by IR), then diluted with ether and filtered through Celite. The solution

was washed with H<sub>2</sub>O, dried (MgSO<sub>4</sub>), and concentrated. The demetallated product was then dissolved in methanol (5.5 mL), and added to a solution of oxalic acid (270 mg, 15.5 equiv) in water (1.4 mL). The reaction mixture was stirred at rt for 24 h, then poured into sat aq K<sub>2</sub>CO<sub>3</sub> and extracted with ether. Preparative TLC (3:2/EA:HEX) yielded 27 mg (75% yield) of the  $\alpha,\beta$  unsaturated ketone as a colorless oil. IR (cm<sup>-1</sup>, CH<sub>2</sub>Cl<sub>2</sub>): 1729, 1679. <sup>1</sup>H NMR (200 MHz, CDCl<sub>3</sub>),  $\delta$  6.89 (ddd,  $J$  = 10.2, 4.7, 3.1 Hz, 1H), 6.08 (br d,  $J$  = 10.2 Hz, 1H), 2.63 (apparent dt,  $J$  = 19.0, 3.1 Hz, 1H), 2.37-1.99 (series of m, 6H), 1.69-1.59 (series of m, 2H), 1.02 (d,  $J$  = 6.7 Hz, 3H). <sup>13</sup>C NMR (50 MHz, CDCl<sub>3</sub>),  $\delta$  219.2, 197.2, 147.0, 129.7, 53.9, 41.0, 39.1, 35.0, 32.8, 26.6, 16.2. HRMS ( $m/z$ ) for MH<sup>+</sup> (C<sub>11</sub>H<sub>15</sub>O<sub>2</sub>): calculated: 179.1072; found: 179.1076.

**Tricarbonyl[2-5- $\eta$ - Cyclohexa-2,4-dienecarboxylic acid allyl-phenyl-amide]iron (14a).**

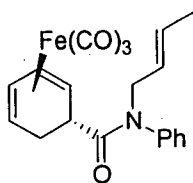

5-carboxylcyclohexa-1,3-dieneirontricarbonyl<sup>2</sup> (200 mg, 0.76 mmol) and 80 mg of 4 Å molecular sieves were dissolved in 2 mL of dry CH<sub>2</sub>Cl<sub>2</sub>, followed by sequential addition of 0.14 mL of Et<sub>3</sub>N, and 0.12 mL of CH<sub>3</sub>SO<sub>2</sub>Cl. The reaction mixture was stirred at rt for 1h, 262 mg of N-crotylaniline and 0.28 mL of Et<sub>3</sub>N were then added at 0 °C, stirred at rt for 12 h, washed with water, and dried (MgSO<sub>4</sub>) to afford 273 mg (86% yield) of the title compound as a light brown oil after chromatography. R<sub>f</sub> = 0.39 (1:9/ EA:HEX). IR (cm<sup>-1</sup>, neat): 2046, 1965, 1651. <sup>1</sup>H NMR (300 MHz, CDCl<sub>3</sub>),  $\delta$  7.50-7.10 (m, 5H), 5.53-5.40 (4H), 4.25-4.00 (2H), 3.07 (m, 1H), 2.88-2.73 (m, 2H), 1.75-1.65 (m, 2H), 1.62 (d,  $J$  = 5.7, 3H). <sup>13</sup>C NMR (50 MHz, CDCl<sub>3</sub>,  $\delta$ ): 211.7, 173.9, 142.1, 129.8, 129.6, 128.3, 128.1,

125.6, 86.3, 85.4, 60.7, 60.1, 52.1, 41.3, 30.0, 17.8. HRMS ( $m/z$ ) for  $MH^+$

( $C_{20}H_{20}FeNO_4$ ): calculated: 394.0742; found: 394.0739.

**Tricarbonyl[2-5- $\eta$ - allyl-cyclohexa-2,4-dienylmethyl-phenyl-amine]iron (14b).**

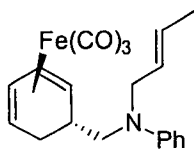

To 100 mg (0.25 mmol) of **14a** in 2 mL of  $CH_2Cl_2$  was added DIBAL (2 mL, 1.5 M in toluene, 3.0 mmol) at  $-78^\circ C$ . The reaction mixture was warmed to rt over 2 h, stirred for 6 h, quenched with water at  $0^\circ C$ , extracted three times with  $CH_2Cl_2$ , dried ( $MgSO_4$ ), and concentrated under vacuum. Flash chromatography on silica gel afforded 93 mg (93% yield) of the title amine as a light brown oil.  $R_f = 0.60$  (1:19/Hex:EA).  $^1H$  NMR (200 MHz,  $CDCl_3$ ),  $\delta$  7.25-6.60 (5H), 5.60-5.20 (4H), 3.84 (d,  $J = 4.4$  Hz, 2H), 3.23-3.00 (3H), 2.91 (dd,  $J = 14.4, 8.6$  Hz, 1H), 2.50 (m, 1H), 2.00 (ddd,  $J = 15.2, 10.5, 3.6$  Hz, 1H), 1.65 (d,  $J = 5.8$ , 3H), 1.72-1.50 (m, 1H).  $^{13}C$  NMR (50 MHz,  $CDCl_3$ ),  $\delta$  211.9, 148.4, 129.2, 127.4, 126.4, 116.1, 112.3, 86.1, 84.8, 64.6, 59.8, 58.8, 36.7, 29.2, 17.7.

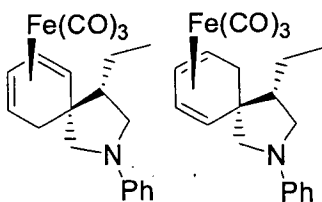

**Tricarbonyl[6-9- $\eta$ - 4-methyl-2-phenyl-2-aza-spiro[4.5]deca-6,8-diene]iron (15).**

A solution of 45 mg of **14b** in 5 mL of  $n$ -Bu<sub>2</sub>O was refluxed for 12 h according to the general procedure. Spiroamines **15** were isolated as a 1.3:1 mixture of epimers (brown oil, 36 mg, 50%), which also contained about 20% inseparable unreacted starting material.  $R_f = 0.60$  (1:19/EA:HEX).  $^1H$  NMR (600 MHz,  $CDCl_3$ ), mixture of epimers,  $\delta$  7.25-6.50 (5H), 5.45-5.32 (2H), 3.54 (dd,  $J = 8.6, 6.6$  Hz, 1H, minor epimer), 3.31 (dd,  $J = 9.0, 6.6$  Hz, 1H, major epimer), 3.24 (m, 1H, minor epimer), 3.20-2.90 (series of m, overlap with other epimer), 2.68 (d,  $J = 8.4$  Hz, 1H,



major epimer), 2.20-1.00 (series of m, overlap with other epimer), 0.97 (t,  $J = 7.8$ , 3H, major epimer), 0.94 (t,  $J = 7.8$ , 3H).  $^{13}\text{C}$  NMR (50 MHz,  $\text{CDCl}_3$ , major epimer,  $\delta$ ): 211.9, 147.4, 129.2, 115.4, 111.1, 86.6, 83.3, 69.3, 63.5, 61.1, 51.5, 50.0, 43.3, 35.1, 29.8, 21.8, 12.6. HRMS ( $m/z$ ) for  $\text{MH}^+$  ( $\text{C}_{20}\text{H}_{22}\text{FeNO}_3$ ): calculated: 380.0954; found: 380.0954.

**Tricarbonyl[1-4- $\eta$ - 5-pent-4-enyl-cyclohexa-1,3-diene]iron (16).**

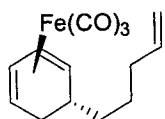

To 520 mg (1.37 mmol) of cation **13** in 10 mL of  $\text{CH}_2\text{Cl}_2$  at  $-78^\circ\text{C}$ , was added dropwise 4-pentenylmagnesium bromide (1.6 mL, 1.1 M solution in  $\text{Et}_2\text{O}$ ) via syringe over 10 min. After being stirred for 2 h at  $-78^\circ\text{C}$ , the reaction was warmed to  $0^\circ\text{C}$ , and quenched with 10 mL of water. The organic layer was separated, and the aqueous layer was extracted with 10 mL of  $\text{CH}_2\text{Cl}_2$  and (2 x 10 mL) ether. The extracts were combined, dried ( $\text{MgSO}_4$ ), and evaporated to give 285 mg (70% yield) of the title compound as a yellow oil after flash chromatography using hexane.  $^1\text{H}$  NMR (200 MHz,  $\text{CDCl}_3$ ),  $\delta$  5.75 (ddt,  $J = 18.0, 10.2, 6.4$  Hz, 1H), 5.40-5.20 (2H), 5.03-4.85 (2H), 3.19-2.98 (2H), 2.15-1.90 (4H), 1.42-1.10 (5H).  $^{13}\text{C}$  NMR (50 MHz,  $\text{CDCl}_3$ ),  $\delta$  212.3, 138.8, 114.5, 85.5, 84.6, 67.2, 60.0, 39.6, 38.2, 33.9, 30.8, 32.6.

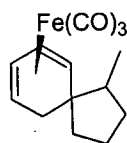

**Tricarbonyl(6-9- $\eta$ -4-methyl-spiro[4.5]deca-6,8-diene)iron (18).**

Complex **16** (61 mg, 0.21 mmol) dissolved in 8 mL of  $n\text{-Bu}_2\text{O}$  was heated for 12 h according to the general procedure to yield, after reverse phase PLC (pure methanol,  $R_f = 0.47$ ), 41 mg (68% yield, yellow oil) of the title product as a mixture of epimers.  $^1\text{H}$  NMR (200 MHz,  $\text{CDCl}_3$ ), mixture of epimers,  $\delta$  5.36-5.24 (2H), 3.25-2.93 (2H), 2.00-1.00 (9H), 0.92 (d,  $J = 7.0$  Hz, 3H), 0.84 (d,  $J = 7.0$  Hz, 3H).  $^{13}\text{C}$  NMR (50

MHz, CDCl<sub>3</sub>), major epimer,  $\delta$  212.5, 85.9, 82.2, 68.5, 61.7, 48.9, 44.9, 43.5, 42.0, 31.7, 22.4, 17.0. HRMS ( $m/z$ ) for MH<sup>+</sup> (C<sub>14</sub>H<sub>17</sub>FeO<sub>3</sub>): calculated: 289.0528; found: 289.0799.

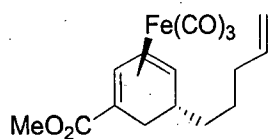

**Tricarbonyl(6-9-η- 5-pent-4-enyl-cyclohexa-1,3-dienecarboxylic acid methyl ester)iron (20).**

Cation **19** (211 mg, 0.5 mmol) was treated with 1.3 equiv of Grignard reagent according to the procedure for **16** to afford 103 mg (60% yield) of the title complex as a light brown oil after flash chromatography on silica gel.  $R_f$  = 0.31 (1:19/EA:HEX). <sup>1</sup>H NMR (200 MHz, CDCl<sub>3</sub>),  $\delta$  6.08 (d,  $J$  = 4.4 Hz, 1H), 5.76 (ddt,  $J$  = 18.0, 10.0, 6.4 Hz, 1H), 5.34 (dd,  $J$  = 6.4, 4.4 Hz, 1H), 5.05–4.88 (2H), 3.69 (s, 3H), 3.30 (ddd,  $J$  = 6.4, 3.5, 1.1 Hz, 1H), 2.43 (dd,  $J$  = 14.6, 10.8 Hz, 1H), 2.22 (m, 1H), 1.65 (apparent t,  $J$  = 6.6, 2H), 1.42–1.15 (4H), 1.07 (dd,  $J$  = 14.6, 3.6 Hz, 1H). <sup>13</sup>C NMR (50 MHz, CDCl<sub>3</sub>),  $\delta$  210.3, 172.7, 138.6, 114.7, 88.6, 84.5, 68.0, 51.6, 39.6, 39.4, 33.8, 29.7, 27.4. HRMS ( $m/z$ ) for MH<sup>+</sup> (C<sub>16</sub>H<sub>19</sub>FeO<sub>5</sub>): calculated: 347.0582; found: 347.0566.

**Tricarbonyl(6-9-η- 1-methyl-spiro[4.5]deca-7,9-diene-7-carboxylic acid methyl ester)iron (25b).**

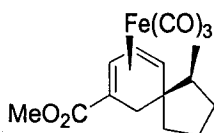

Complex **20** (40 mg) dissolved in anhyd *n*-Bu<sub>2</sub>O (5 mL) was heated for 12 h according to the general procedure to yield the title compound as a yellow oil (20 mg, 50% yield), along with 30% of other inseparable isomers after preparative TLC.  $R_f$  = 0.35 (1:19/EA:HEX). <sup>1</sup>H NMR (200 MHz, CDCl<sub>3</sub>),  $\delta$  6.09 (d,  $J$  = 4.4 Hz, 1H), 5.34 (dd,  $J$  = 6.4, 4.4 Hz, 1H), 3.71 (s, 3H), 3.14 (d,  $J$  = 6.4 Hz, 1H), 2.36 (d,  $J$  = 15.6 Hz, 1H), 1.40 (d,  $J$  = 15.6 Hz, 1H), 2.22–

1.15 (m, 7H), 0.92 (d,  $J = 7.2$  Hz, 3H).  $^{13}\text{C}$  NMR (50 MHz,  $\text{CDCl}_3$ ),  $\delta$  210.4, 90.8, 87.8, 82.3, 73.0, 51.7, 48.4, 44.5, 42.6, 35.7, 32.1, 21.0, 16.5. HRMS ( $m/z$ ) for  $\text{MH}^+$  ( $\text{C}_{16}\text{H}_{19}\text{FeO}_5$ ): calculated: 347.0582; found: 347.0550.

**Tricarbonyl(2-5- $\eta$ - 2-cyclohexa-2,4-dienyl-hex-5-enoic acid methyl ester)iron (26).**

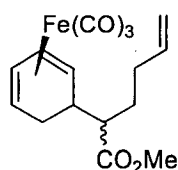

To a stirred solution of LDA (1 mmol, 0.5 mL, 2 M in heptane/THF) at  $-78^\circ\text{C}$  under Ar was added 130 mg of methyl 5-hexenoate in 1 mL of THF. The mixture was stirred for 20 min, after which time the complex **13** (364 mg, 1 mmol) was added in one portion. Stirring was continued at  $-78^\circ\text{C}$  for 30 min, and the reaction mixture was allowed to warm to rt. The title compound was obtained as a 2:1 mixture of diastereomers (223 mg, 70%) following workup as for **16** and flash chromatography.  $R_f = 0.31$  (1:19/Hex:EA).  $^1\text{H}$  NMR (200 MHz,  $\text{CDCl}_3$ ), mixture of isomers,  $\delta$  5.82-5.60 (m, 1H), 5.40-5.26 (2H), 5.15-4.92 (2H), 3.69 (s, 3H, major isomer), 3.65 (s, 3H, minor isomer), 3.10-2.83 (series of m, 2H), 2.40-1.33 (series of m, 8H).  $^{13}\text{C}$  NMR (50 MHz,  $\text{CDCl}_3$ ,  $\delta$ ): 211.8, 175.2, 137.6, 115.3, 85.6, 85.1, 62.7, 59.1, 53.4, 51.5, 40.8, 31.8, 30.4, 28.8. HRMS ( $m/z$ ) for  $\text{MH}^+$  ( $\text{C}_{16}\text{H}_{19}\text{FeO}_5$ ): calculated: 347.0582; found: 347.0571.

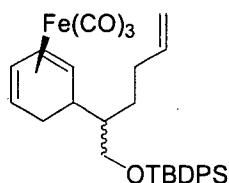

**Tricarbonyl(2-5- $\eta$ - tert-butyl-(2-cyclohexa-2,4-dienyl-hex-5-enyloxy)-diphenyl-silane)iron (28).**

To a solution of 134 mg (0.39 mmol) of complex **26** in 1 mL of dichloromethane at  $-78^\circ\text{C}$  under Ar was added 1 mL of 1.5 M DIBAL in Toluene. The

reaction mixture was stirred for 2 h, then warmed to 0 °C over 2 h, quenched with water at 0 °C, extracted three times with CH<sub>2</sub>Cl<sub>2</sub>, dried (MgSO<sub>4</sub>), and concentrated under vacuum to give the intermediate alcohol.  $R_f = 0.32$  (1:4/Hex:EA). The alcohol, 6.8 mg of DMAP, 55.8 mg of imidazole, and one drop of DMF were dissolved in 0.5 mL of dichloromethane at 0 °C. *t*-Butyldiphenylsilyl chloride (135 mg, 1.2 equiv) was added slowly. The reaction mixture was stirred at rt for 1 h, filtered through Celite, washed with sat. aq. NH<sub>4</sub>Cl and H<sub>2</sub>O, dried (MgSO<sub>4</sub>), and evaporated. Chromatography gave the title compound (150 mg, 75% over two steps) as a 2:1 mixture of diastereomers (colorless oil). <sup>1</sup>H NMR (300 MHz, CDCl<sub>3</sub>), mixture of isomers,  $\delta$  7.75-7.66 (4H), 7.50-7.30 (6H), 5.82-5.67 (m, 1H), 5.40-5.16 (2H), 5.05-4.90 (2H), 3.50 (2H), 3.00 (2H), 2.45 (m, 1H), 2.10-1.80 (series of m, 3H), 1.45-1.20 (4H), 1.07 (s, 9H). <sup>13</sup>C NMR (75 MHz, CDCl<sub>3</sub>), major isomer,  $\delta$  212.5, 139.0, 135.8, 133.9, 129.8, 127.8, 114.7, 85.6, 85.0, 65.2, 64.7, 46.8, 39.8, 32.1, 28.8, 27.7, 27.5, 27.1, 19.4. HRMS ( $m/z$ ) for (M-3CO)<sup>+</sup> (C<sub>28</sub>H<sub>36</sub>FeOSi): calculated: 472.1885; found: 472.1868.

**Tricarbonyl(6-9- $\eta$ - *tert*-Butyl-(4-methyl-spiro[4.5]deca-6,8-dien-1-ylmethoxy)-diphenylsilane)iron (30).**

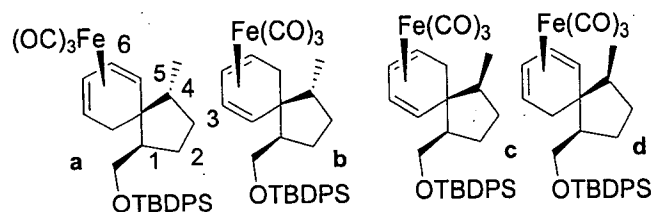

Complex **28** (70 mg)

dissolved in anhyd *n*-Bu<sub>2</sub>O (5 mL)

was heated for 12 h according to the

general procedure to yield after preparative TLC (1:9/EA:HEX), the title compound (56 mg, 80% yield) as a colorless oil, which contained four isomers

(**30a:30b:30c:30d**/4.5:4:1:1). <sup>1</sup>H NMR (600 MHz, CDCl<sub>3</sub>,  $\delta$ ): characteristic peaks **30a**:

3.70 (dd,  $J = 10.2, 3.6$  Hz, 1H), 3.32 (dd,  $J = 10.2, 7.8$  Hz, 1H), 3.00 (m, 1H), 2.66 (dd,  $J = 6.6, 1.2$  Hz, 1H), 1.04 (s, 9H), 0.93 (d,  $J = 7.2$  Hz, 3H). **30b**: 3.65 (dd,  $J = 10.2, 6.0$  Hz, 1H), 3.54 (dd,  $J = 10.2, 7.2$  Hz, 1H), 3.08 (m, 1H), 2.64 (m, 1H), 1.05 (s, 9H), 0.83 (d,  $J = 7.2$  Hz, 3H).

**tert-Butyl-(4-methyl-spiro[4.5]dec-1-ylmethoxy)-diphenyl-silane (31).**

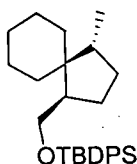

Complexes **30** (56 mg, 0.1 mmol) were treated with 30 mg of trimethylamine N-oxide in 1 mL of benzene. The reaction mixture was stirred at 60 °C for 2 h, filtered through Celite, evaporated, and dissolved in 1 mL of methanol containing 5 mg of 10% Pd on activated carbon under a balloon of hydrogen gas. After stirring at rt overnight, the reaction mixture was then filtered and concentrated to give 42 mg (>95% yield) of the title compound as a 4.5:1 mixture of diastereomers (colorless oil).  $^1\text{H}$  NMR (200 MHz,  $\text{CDCl}_3$ ),  $\delta$  7.75-7.66 (4H), 7.50-7.30 (6H), 3.74 (dd,  $J = 9.8, 5.2$  Hz, 1H), 3.48 (dd,  $J = 10.2, 8.8$  Hz, 1H), 2.10-1.00 (16H), 1.07 (s, 9H), 0.82 (d,  $J = 6.8$  Hz, 3H).  $^{13}\text{C}$  NMR (50 MHz,  $\text{CDCl}_3$ ),  $\delta$  135.7, 134.2, 129.5, 127.6, 65.1, 46.3, 45.8, 40.0, 30.6, 30.5, 27.0, 26.8, 26.6, 25.4, 23.2, 22.9, 19.3, 15.1. HRMS ( $m/z$ ) for (M-t-Bu) $^+$  ( $\text{C}_{24}\text{H}_{31}\text{OSi}$ ): calculated: 363.2144; found: 363.2126.

<sup>1</sup> EA:HEX=Ethyl acetate:Hexane

<sup>2</sup> Bandara, B. M. R.; Birch, A. J.; Raverty, W. D. *J. Chem. Soc., Perkin Trans. I* **1982**, 1755.

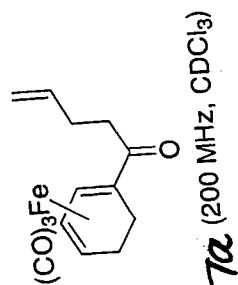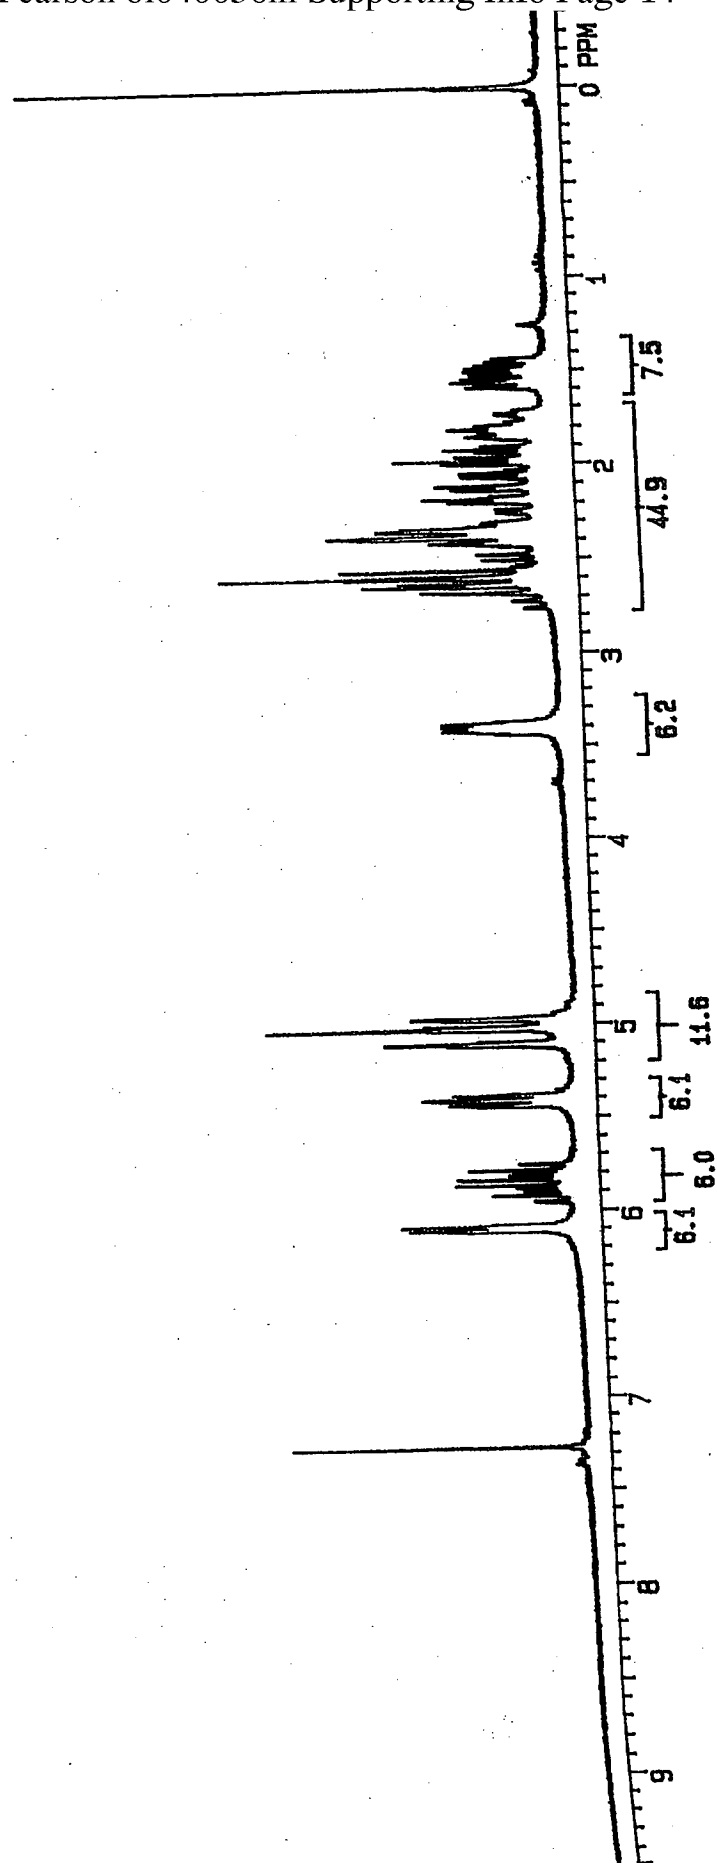

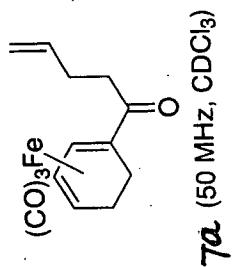

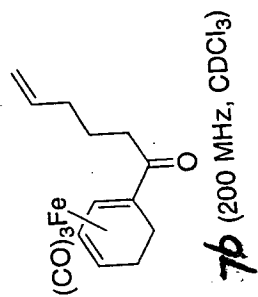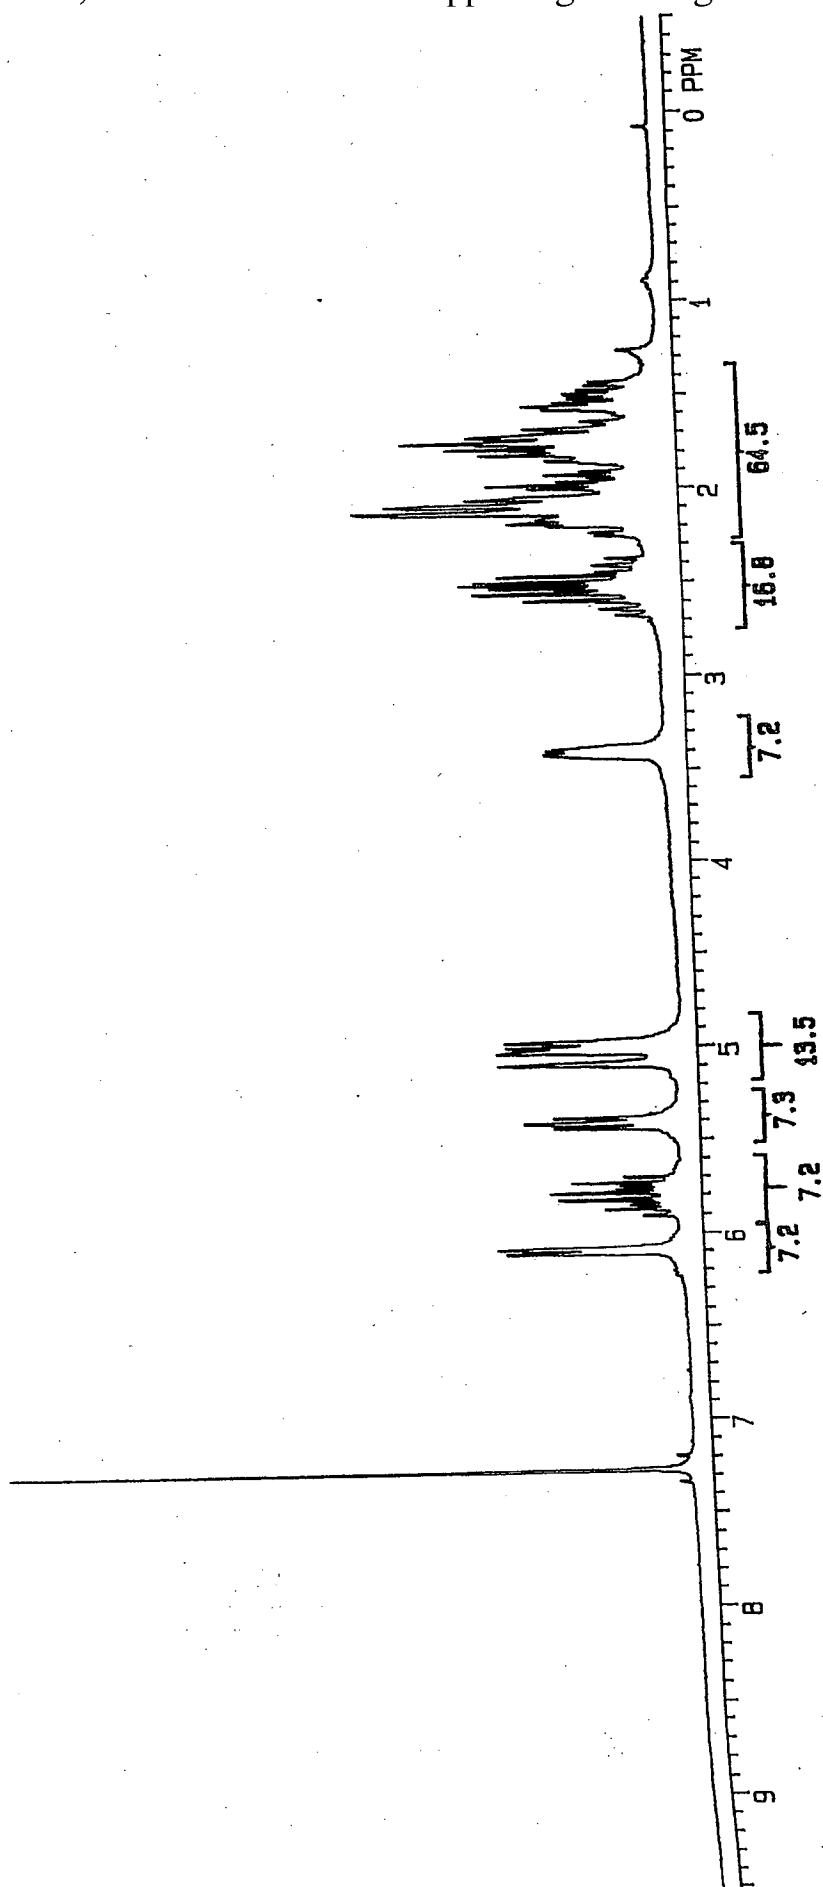



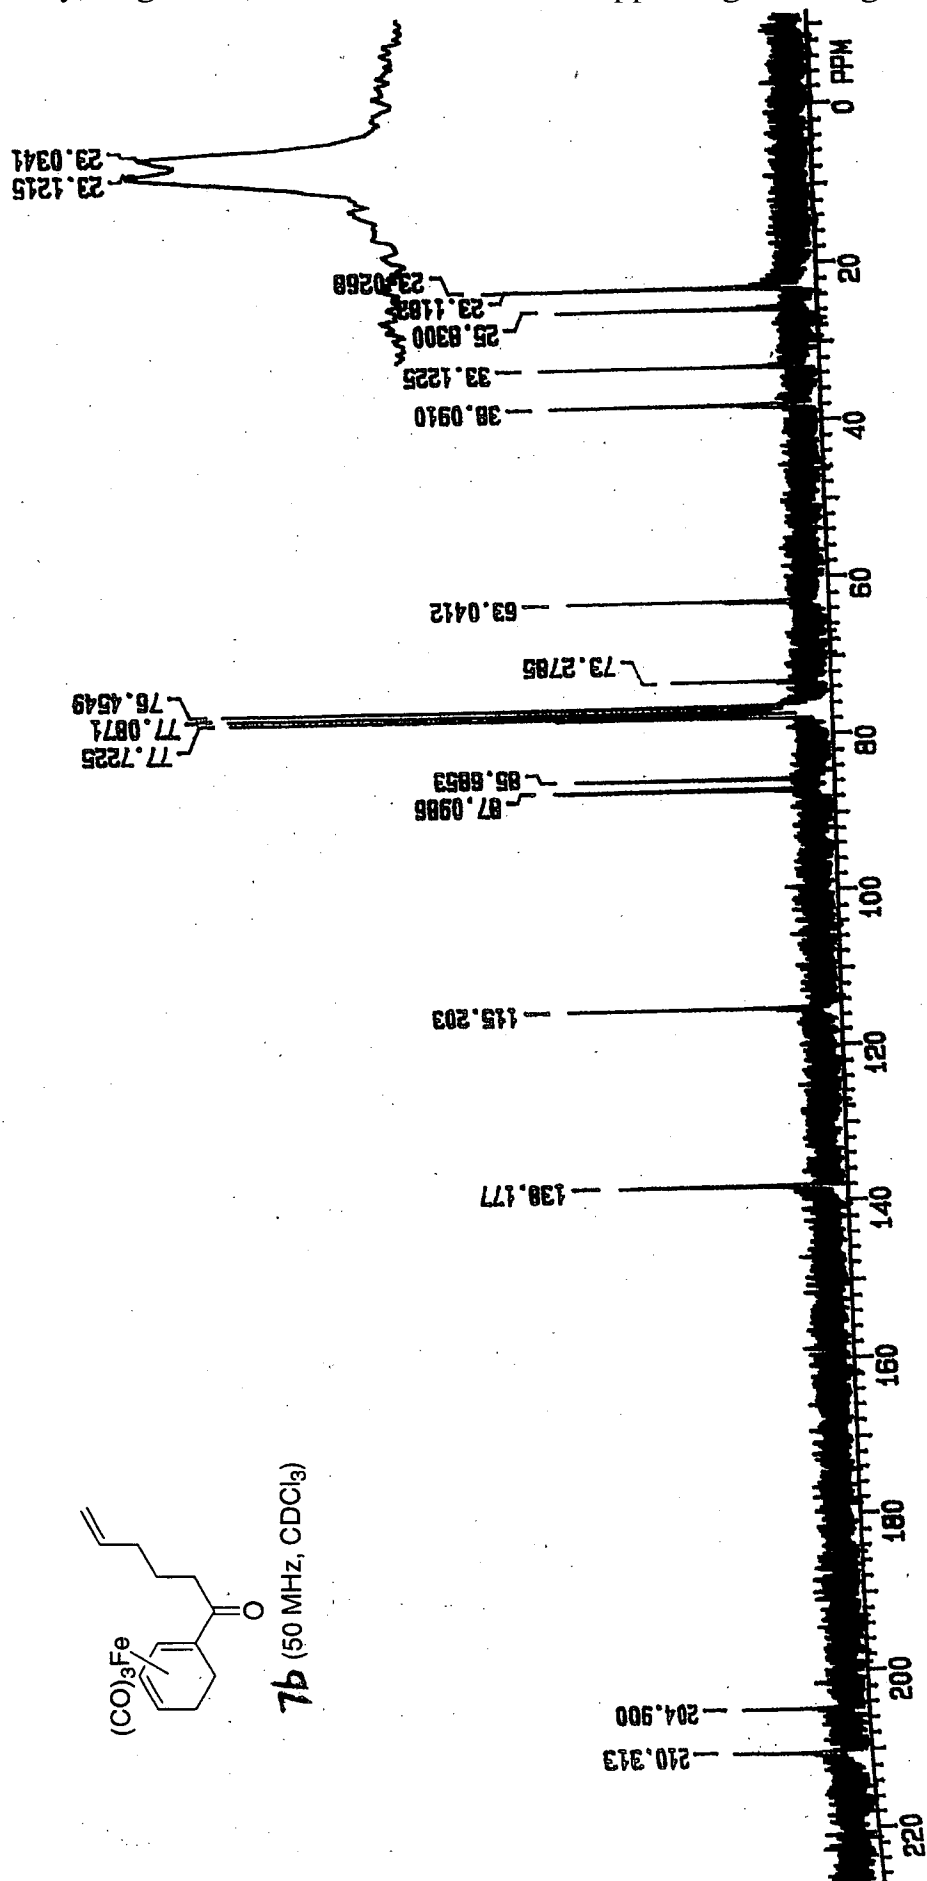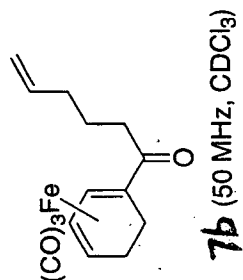

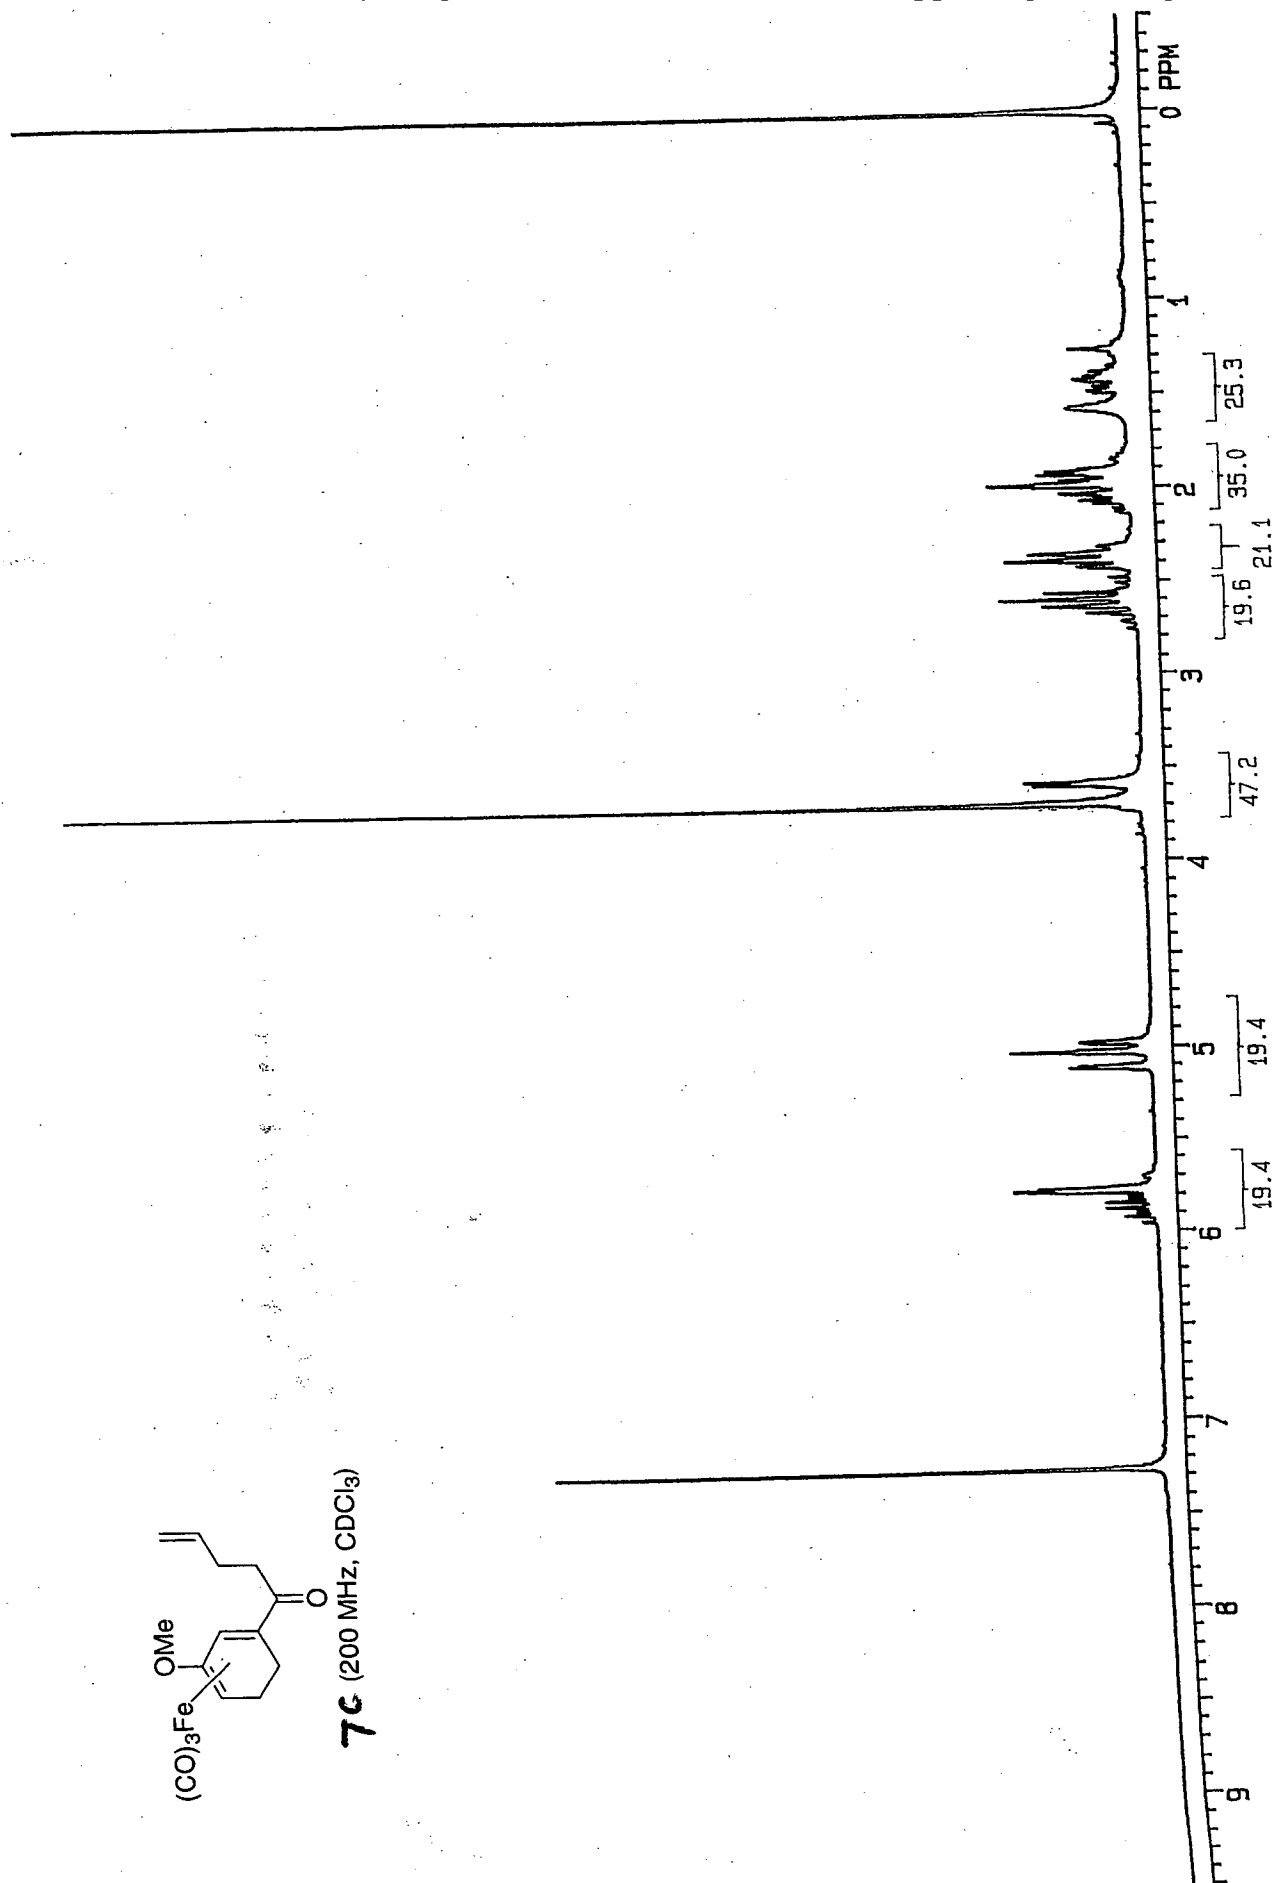

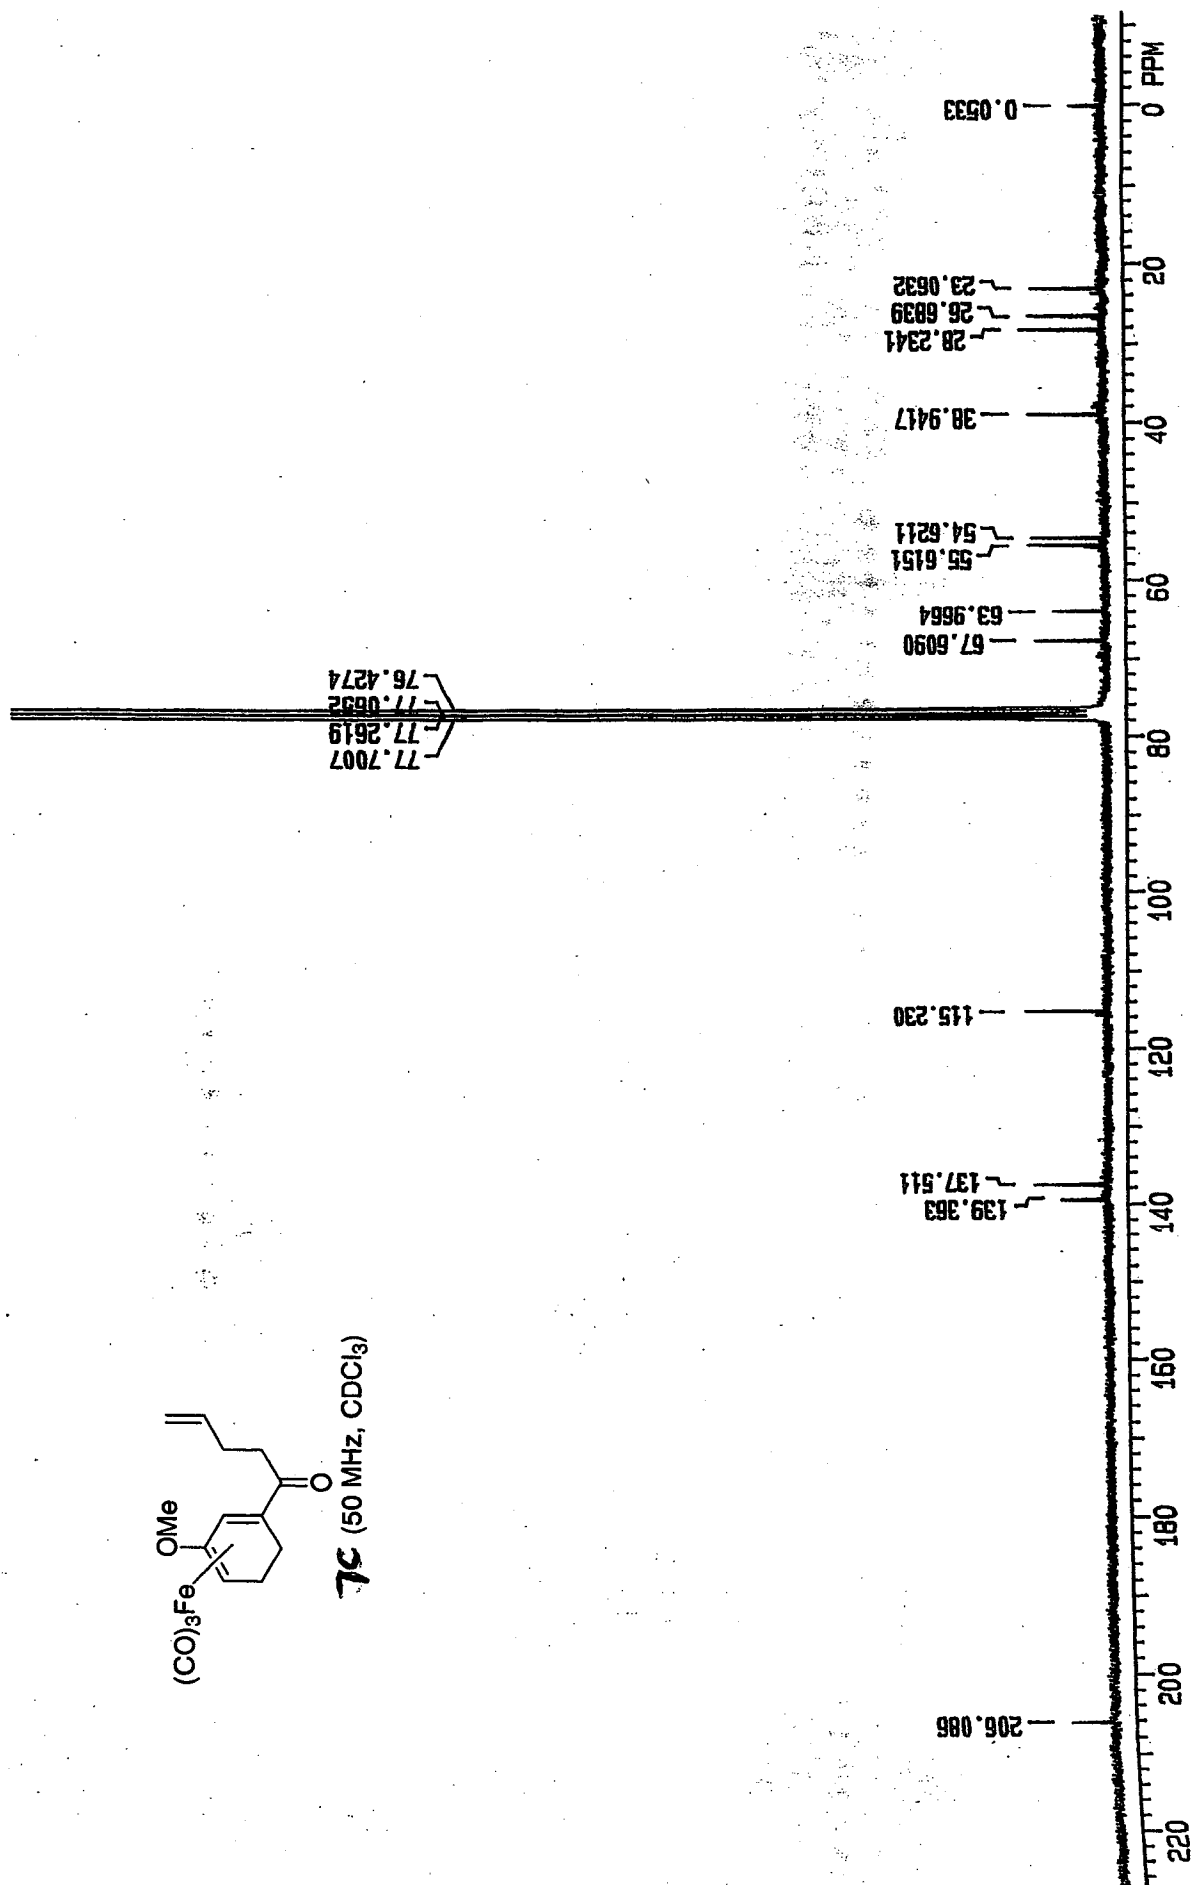

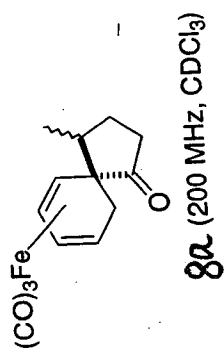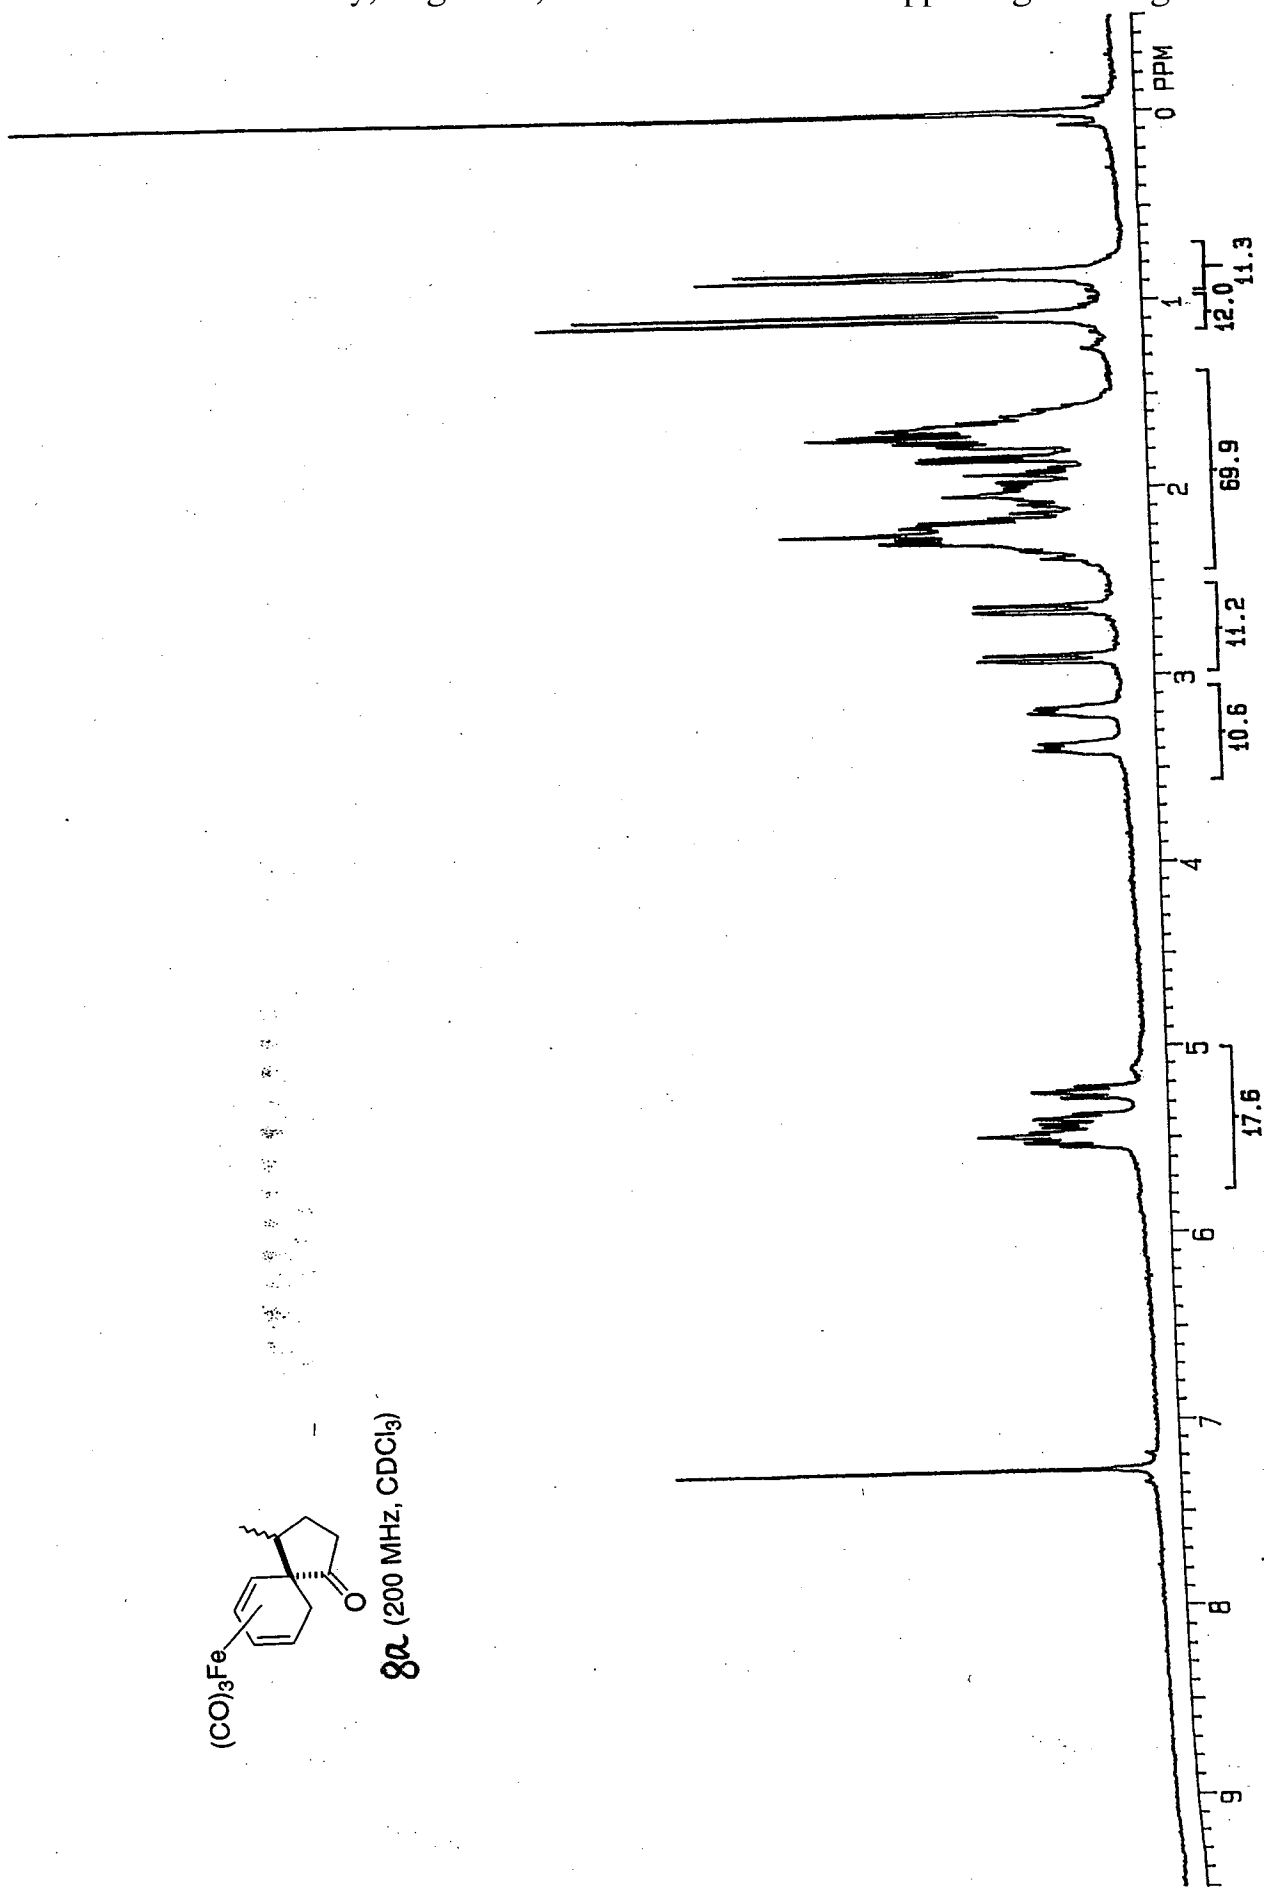

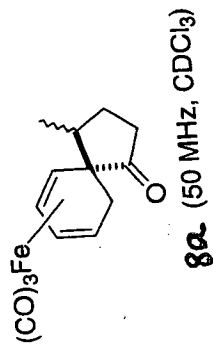

Ismet  
 exp1 s2pu1  
 SAMPLE  
 date Jun 20 2001  
 solvent CDCl3  
 file ACQUISITION  
 sw 8999.2  
 at 3.500  
 np 67194  
 fb 5000  
 bs 32  
 di 1.000  
 nt 15  
 Ct TRANSMITTER H1  
 tn 599.920  
 sfrq 599.7  
 tof 59  
 tpwr 4.133  
 pw DECOUPLER C13  
 dn 0  
 dof nnn  
 dm C  
 dmm 39  
 dpwr 35088  
 dmf af  
 SPECIAL  
 temp not used  
 gain not used  
 spin 22  
 hst 0.008  
 pw90 12.400  
 alfa 0  
 FLAGS  
 ll n  
 in y  
 dp nn  
 hs  
 PROCESSING  
 not used  
 DISPLAY  
 fn -300.0  
 sp 6298.0  
 wp 1228.5  
 rfl  
 rfp -34.0  
 rp -22.0  
 PLOT  
 wc 250  
 sc 0  
 vs 301  
 th 2  
 ph

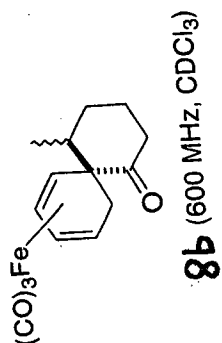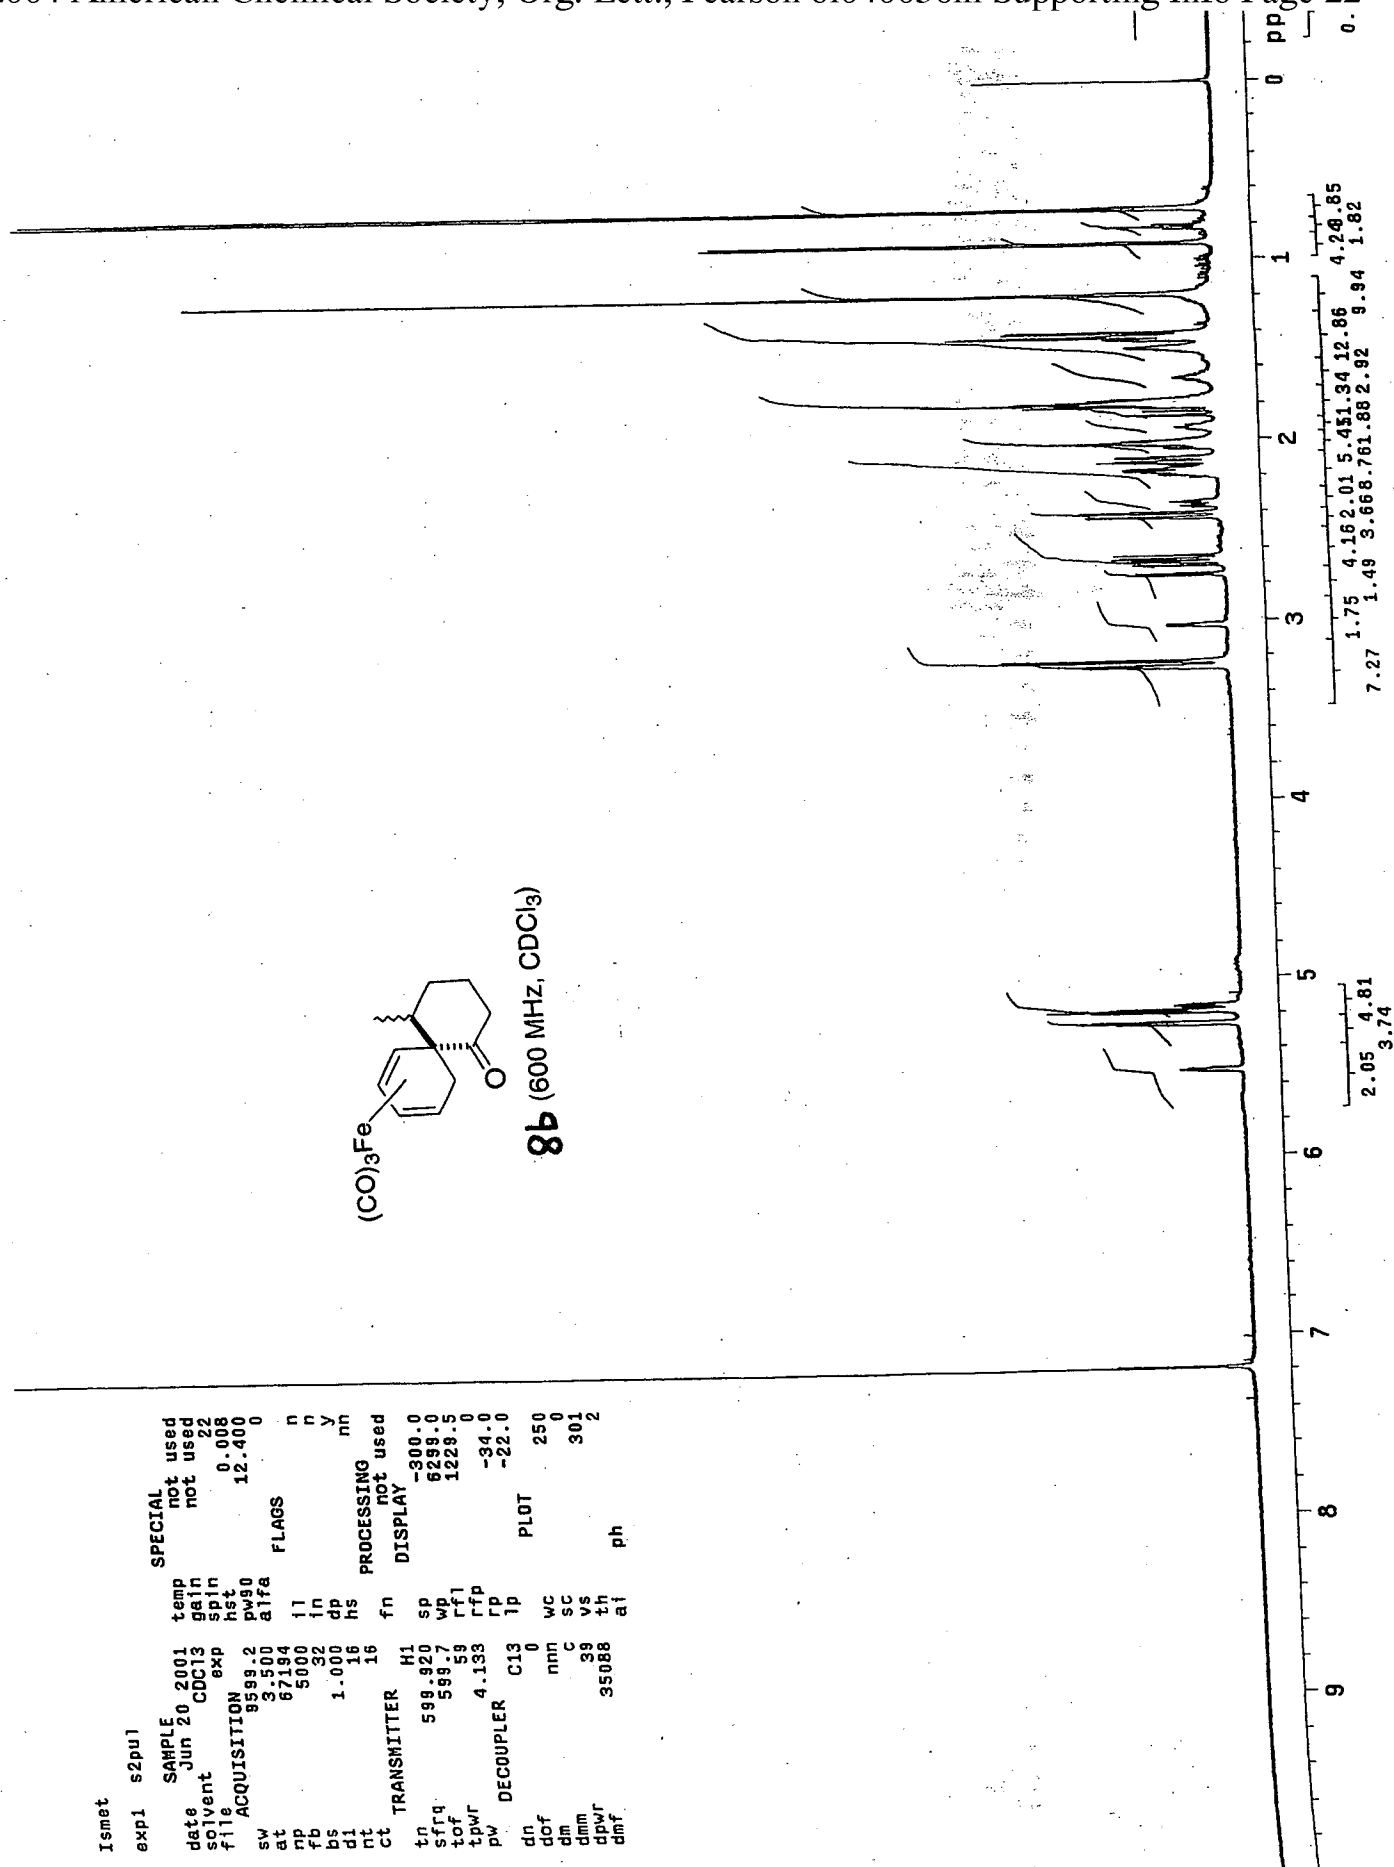

S23

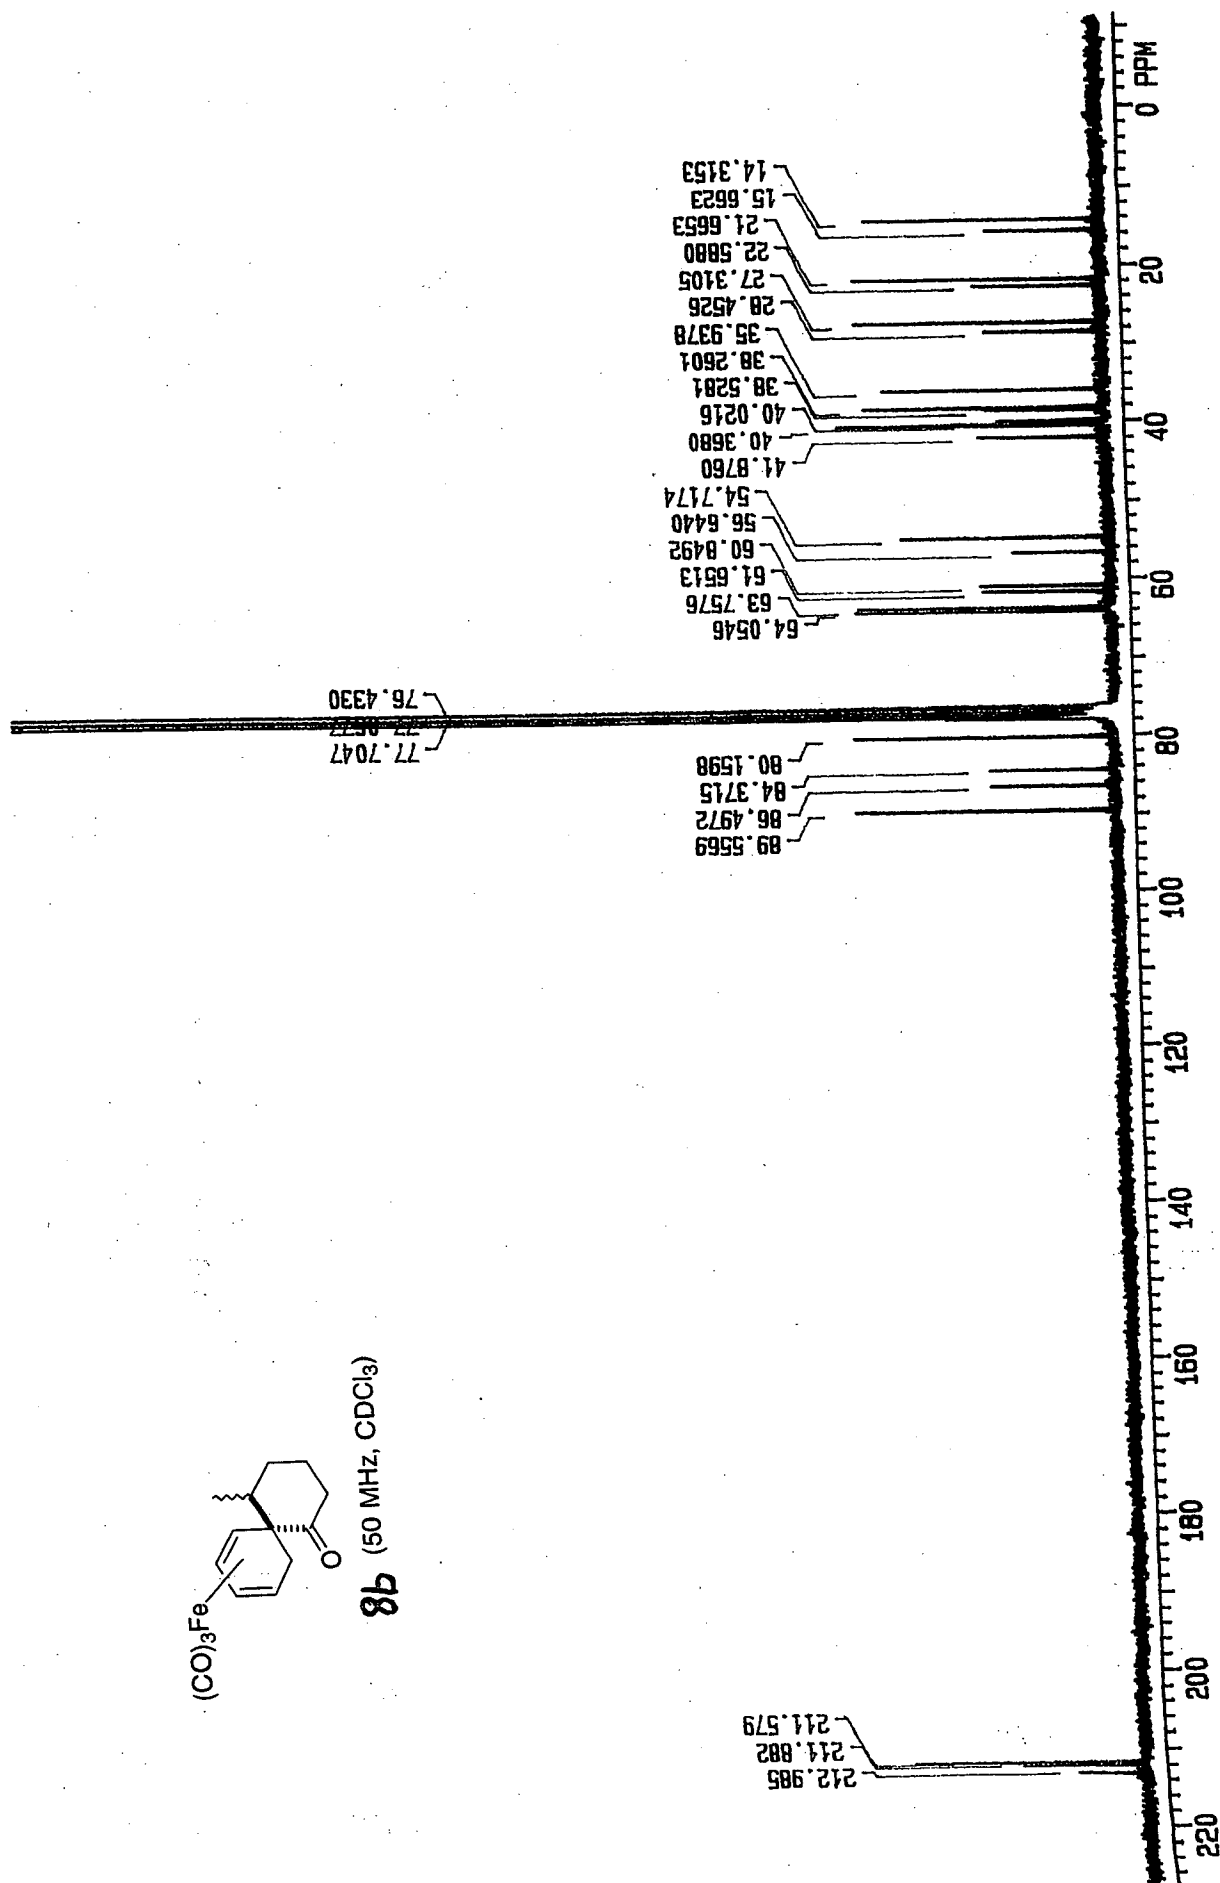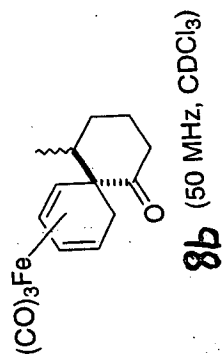

S 24

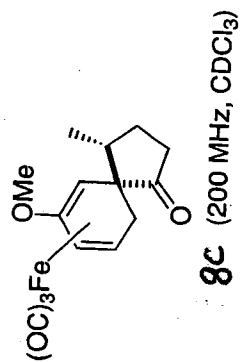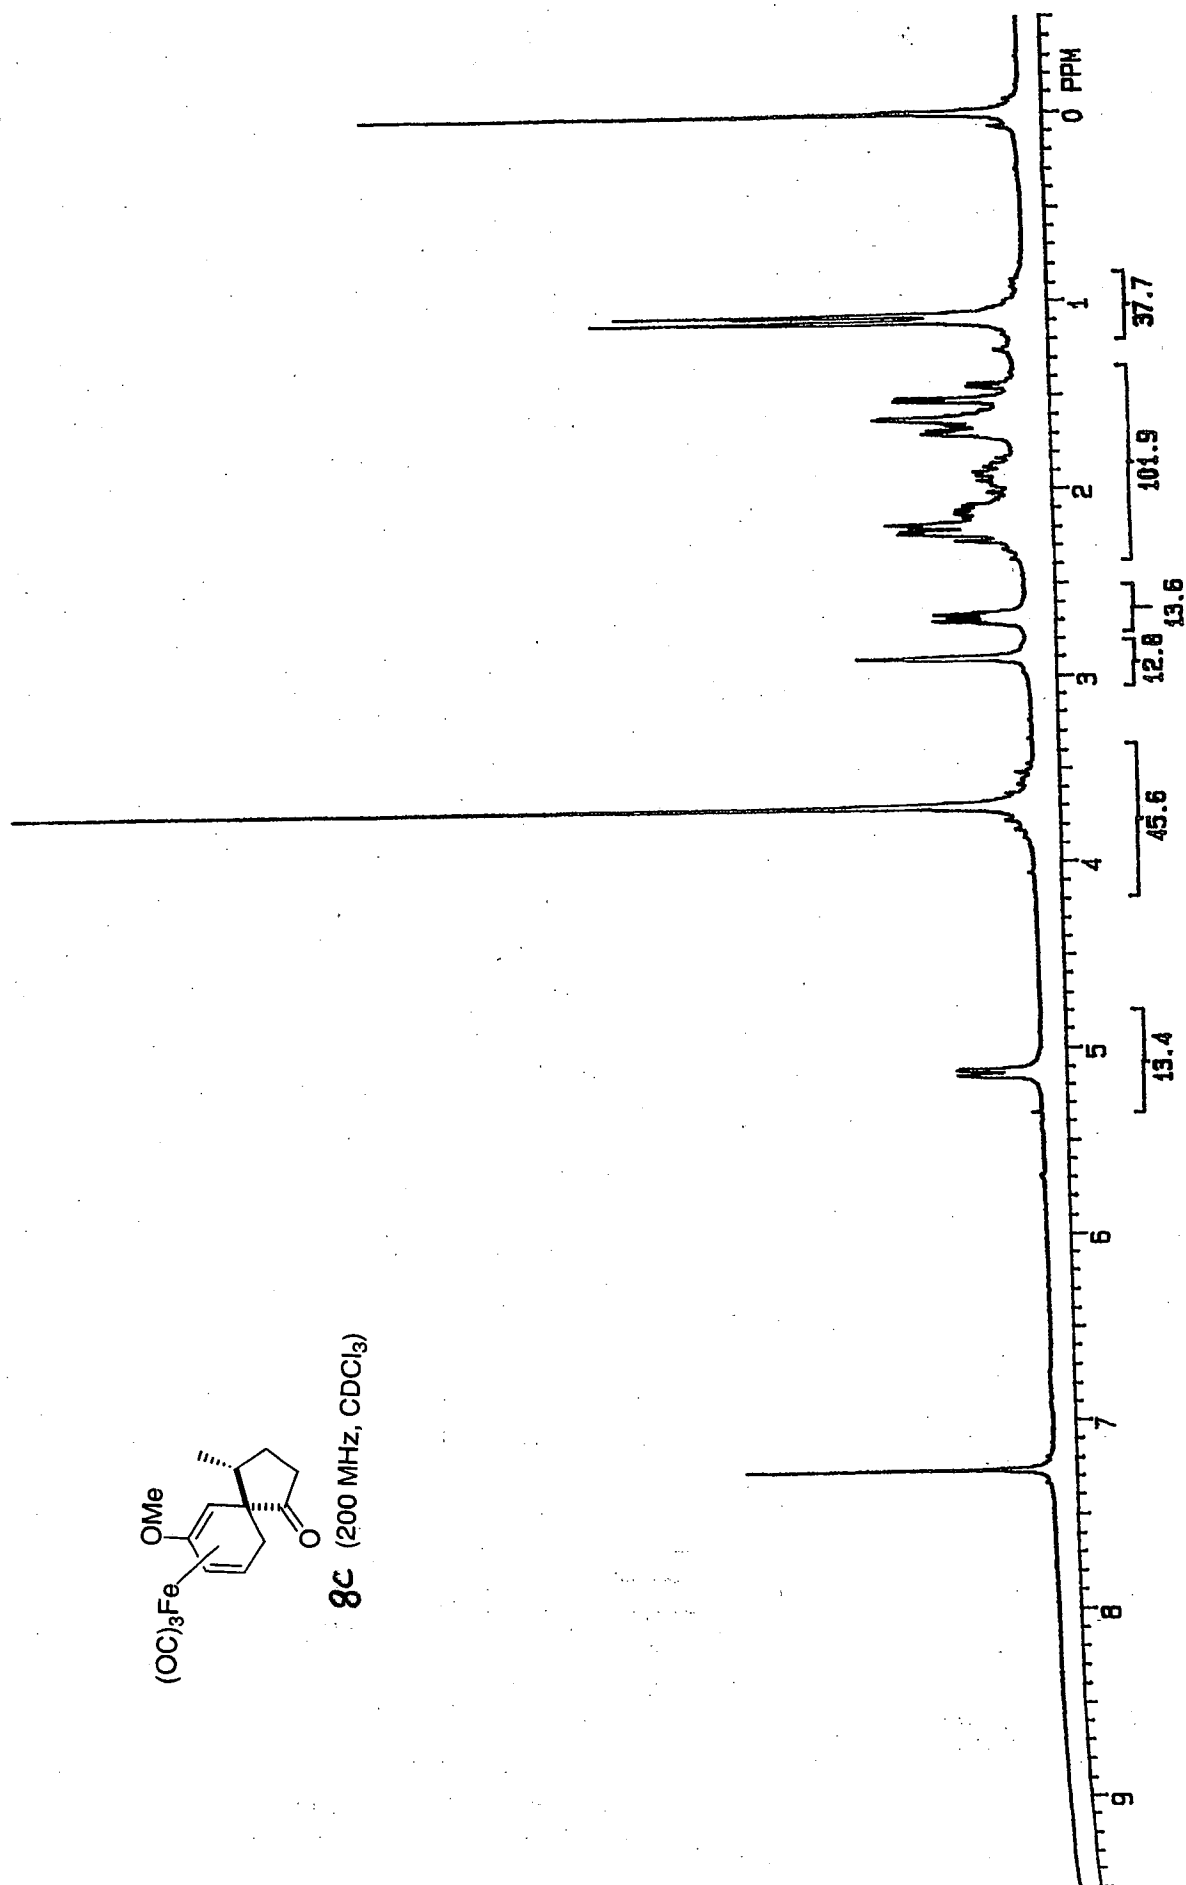



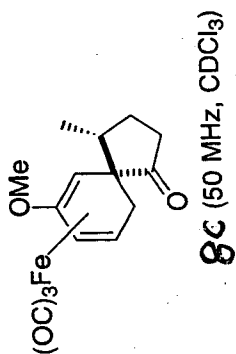

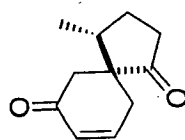

**9** (200 MHz, CDCl<sub>3</sub>)

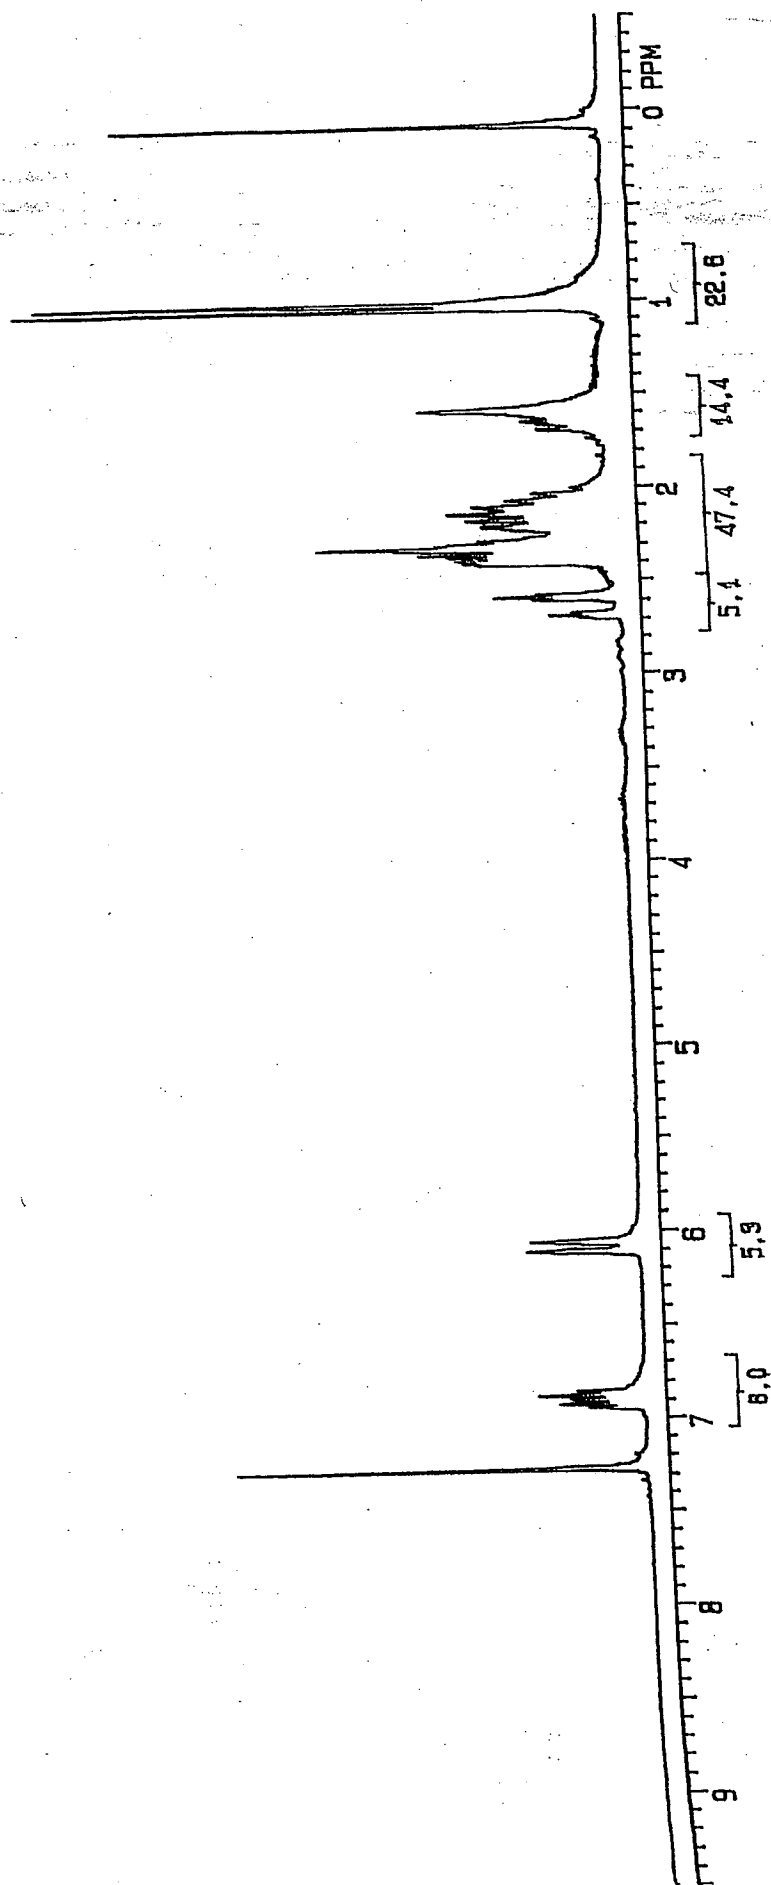

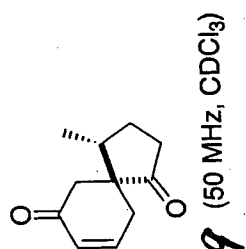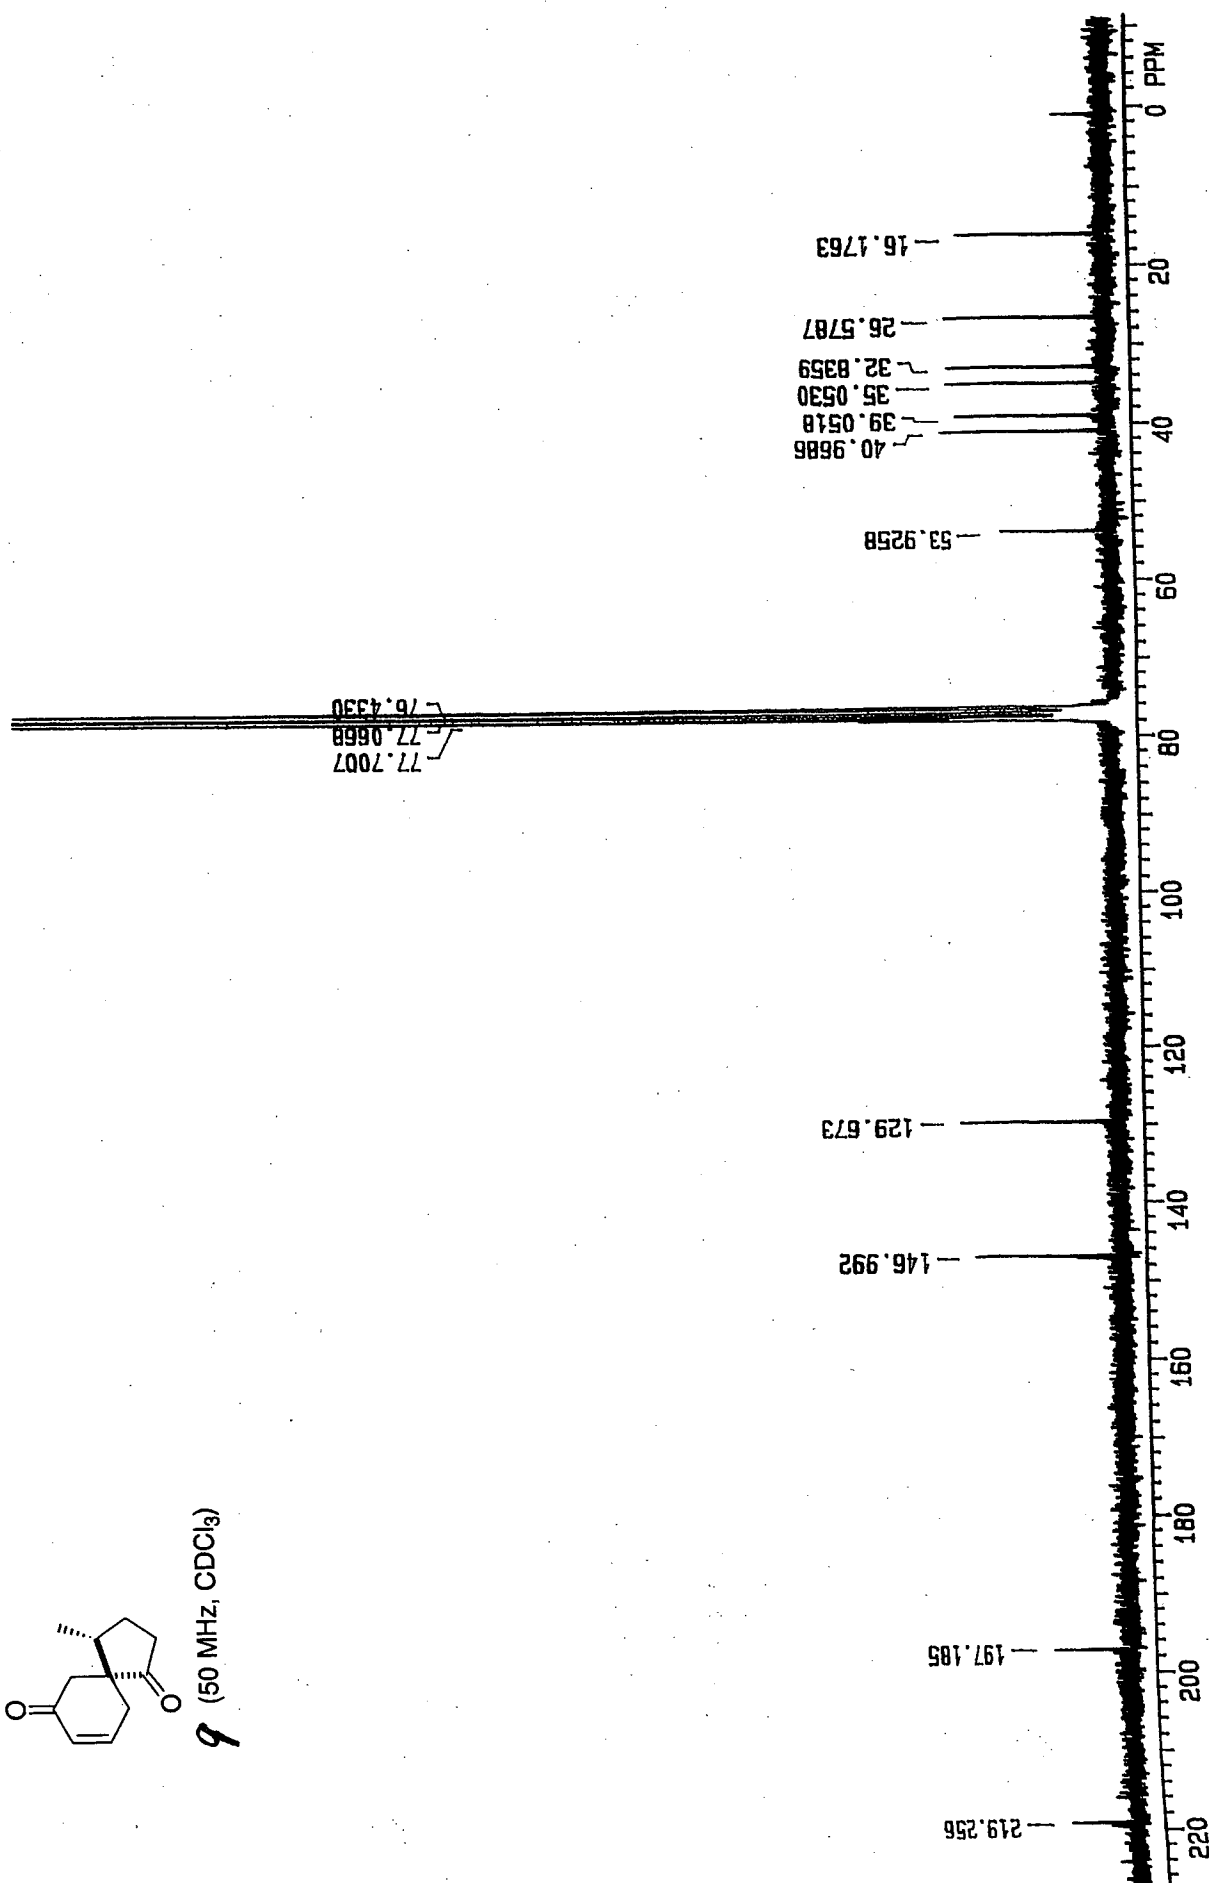

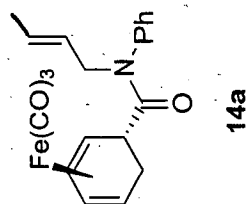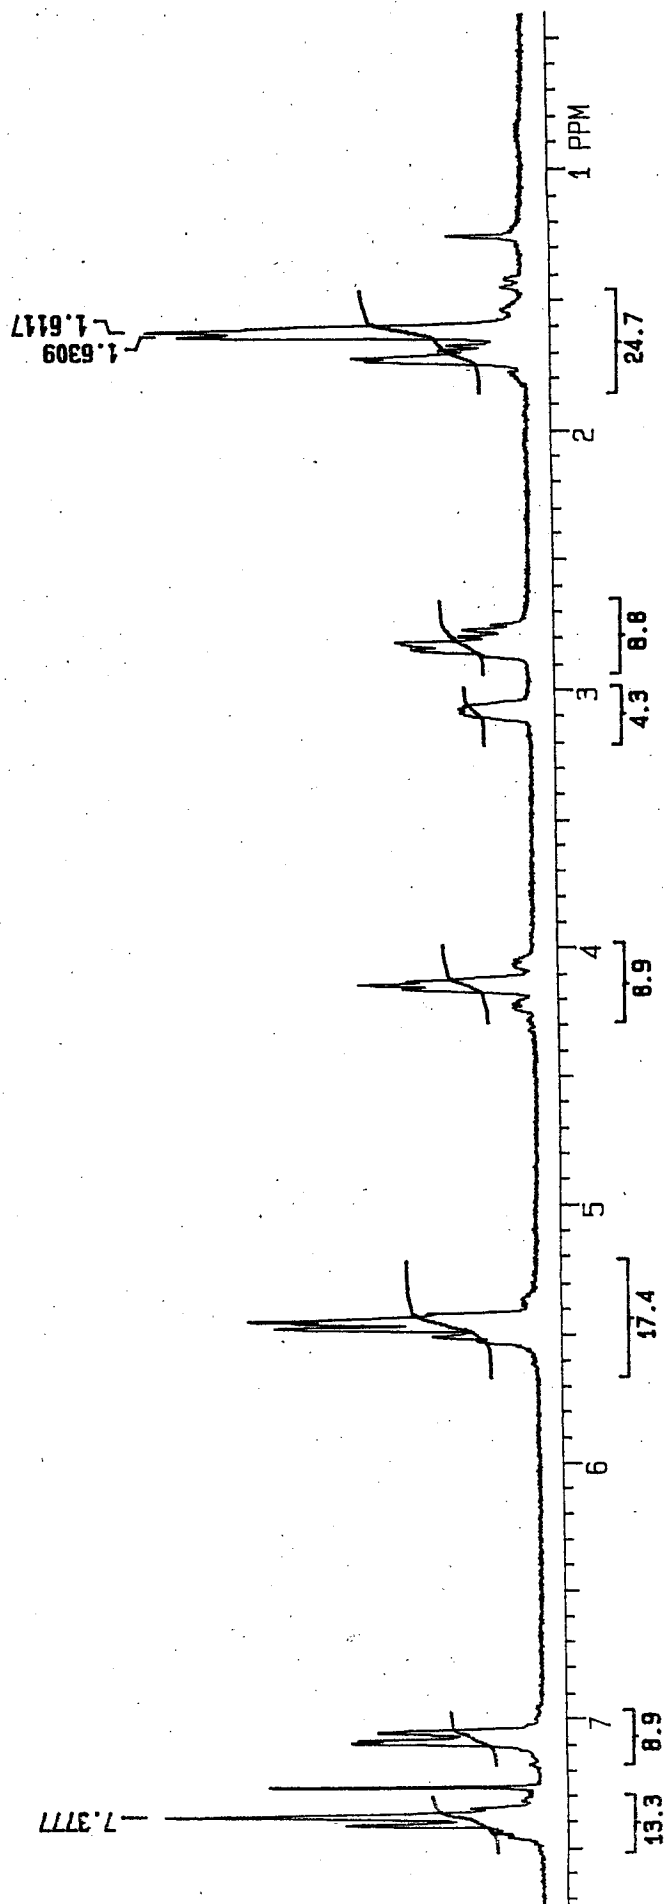

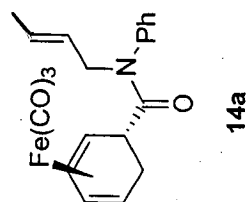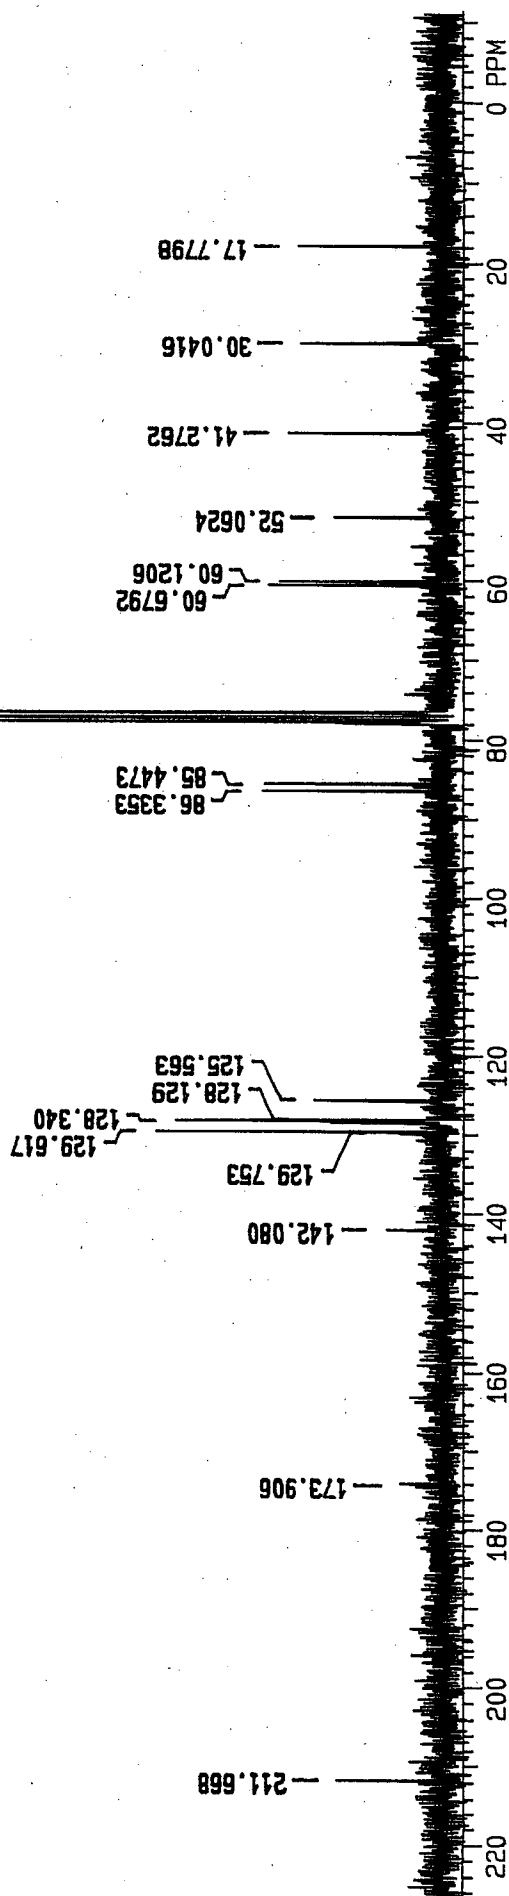

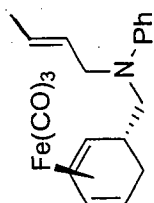

14b

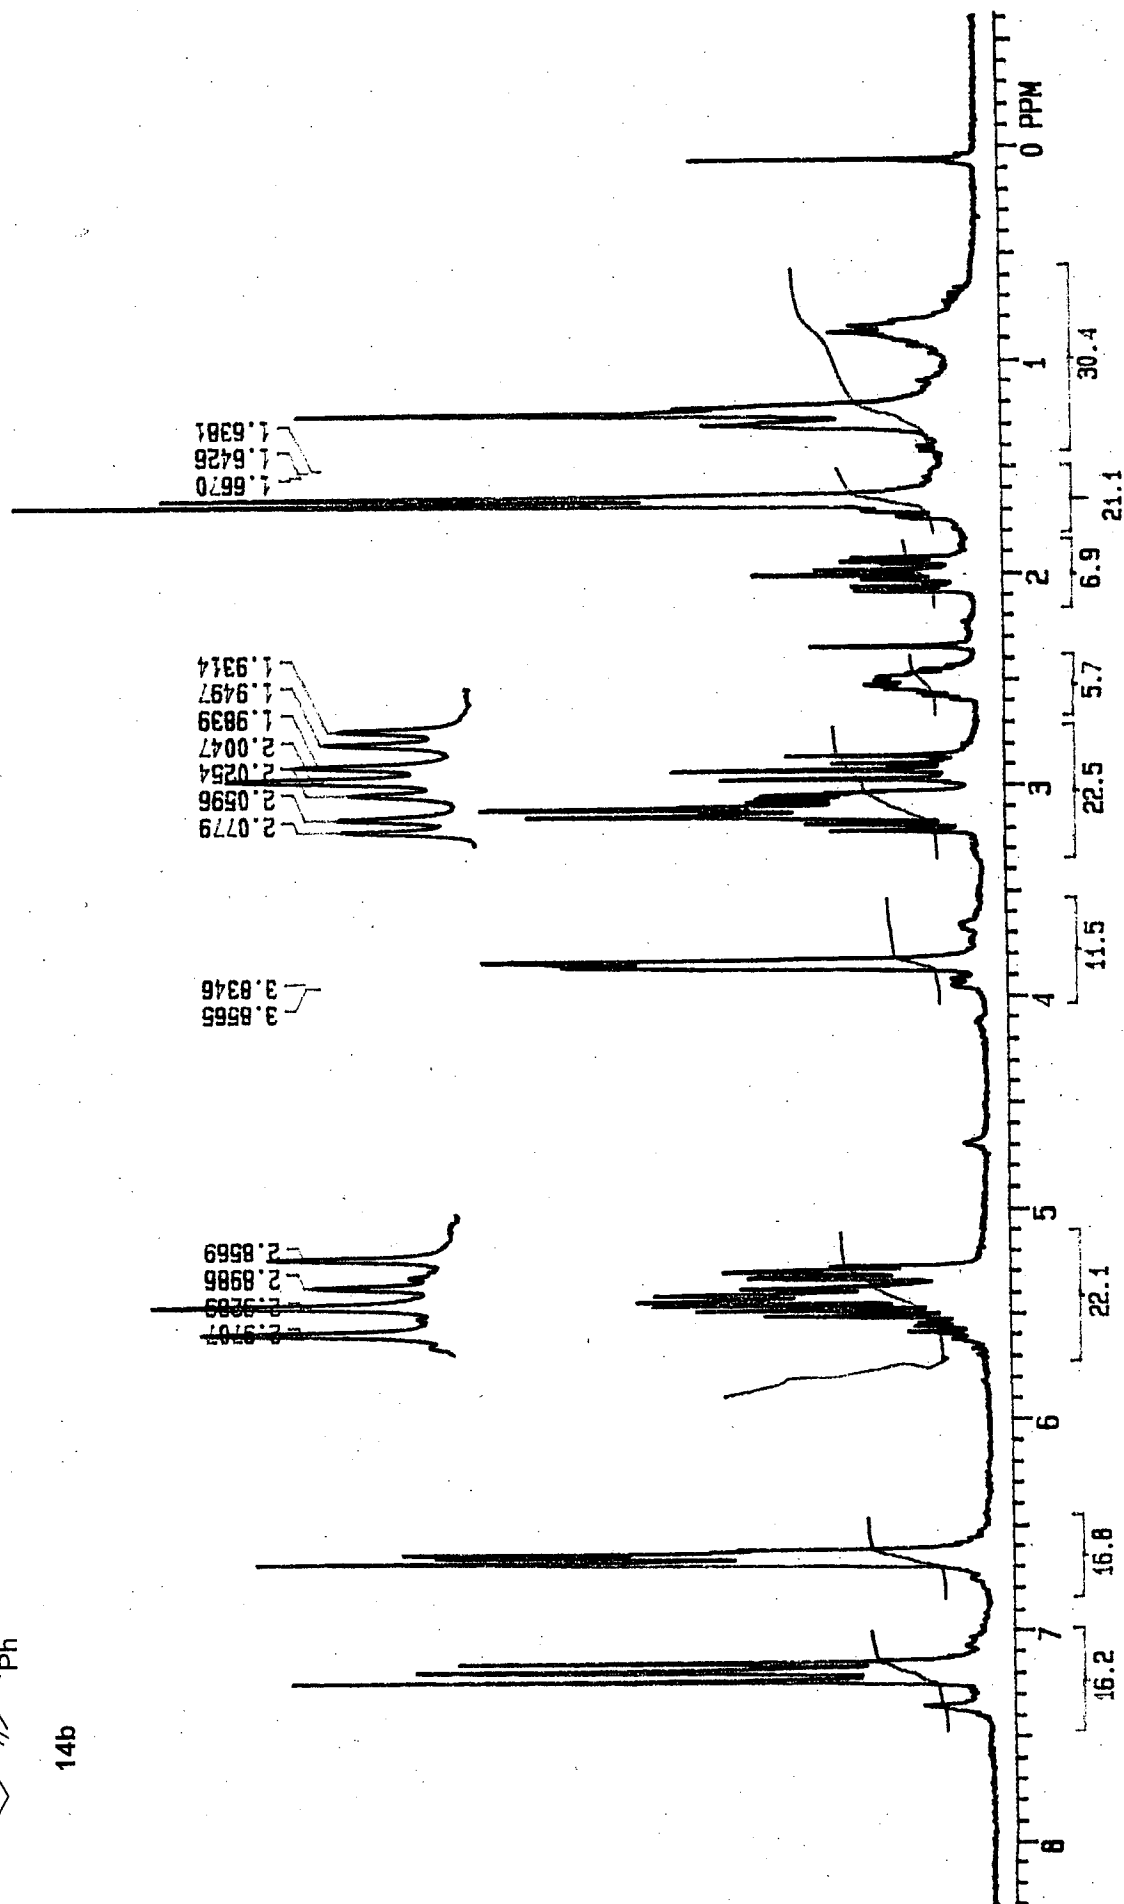

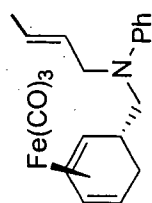

14b

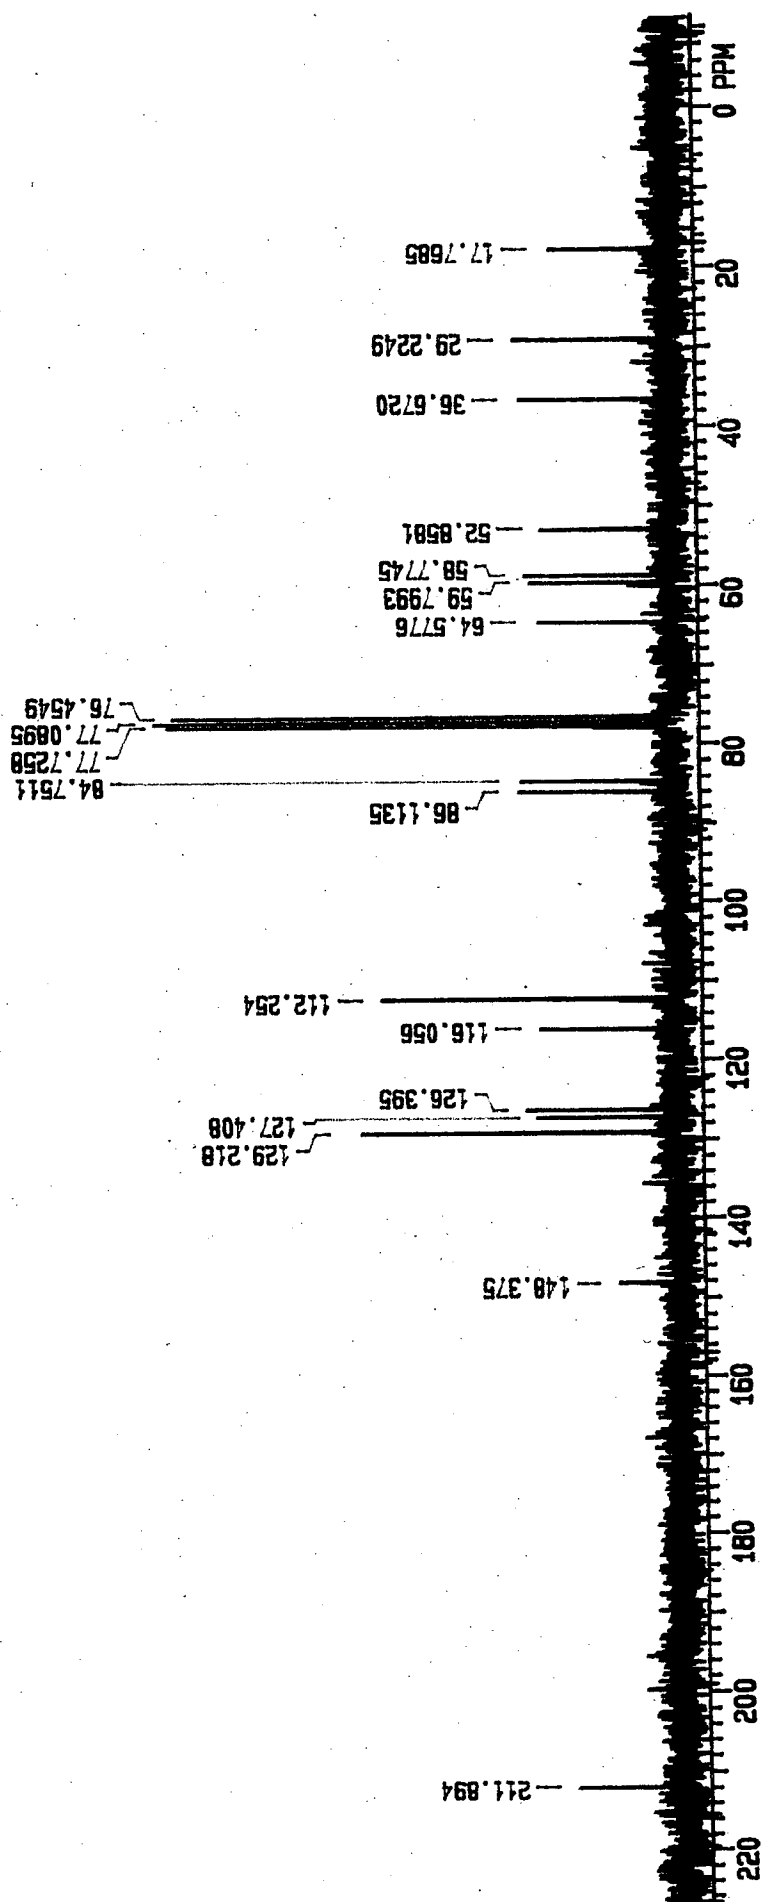

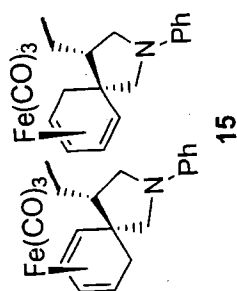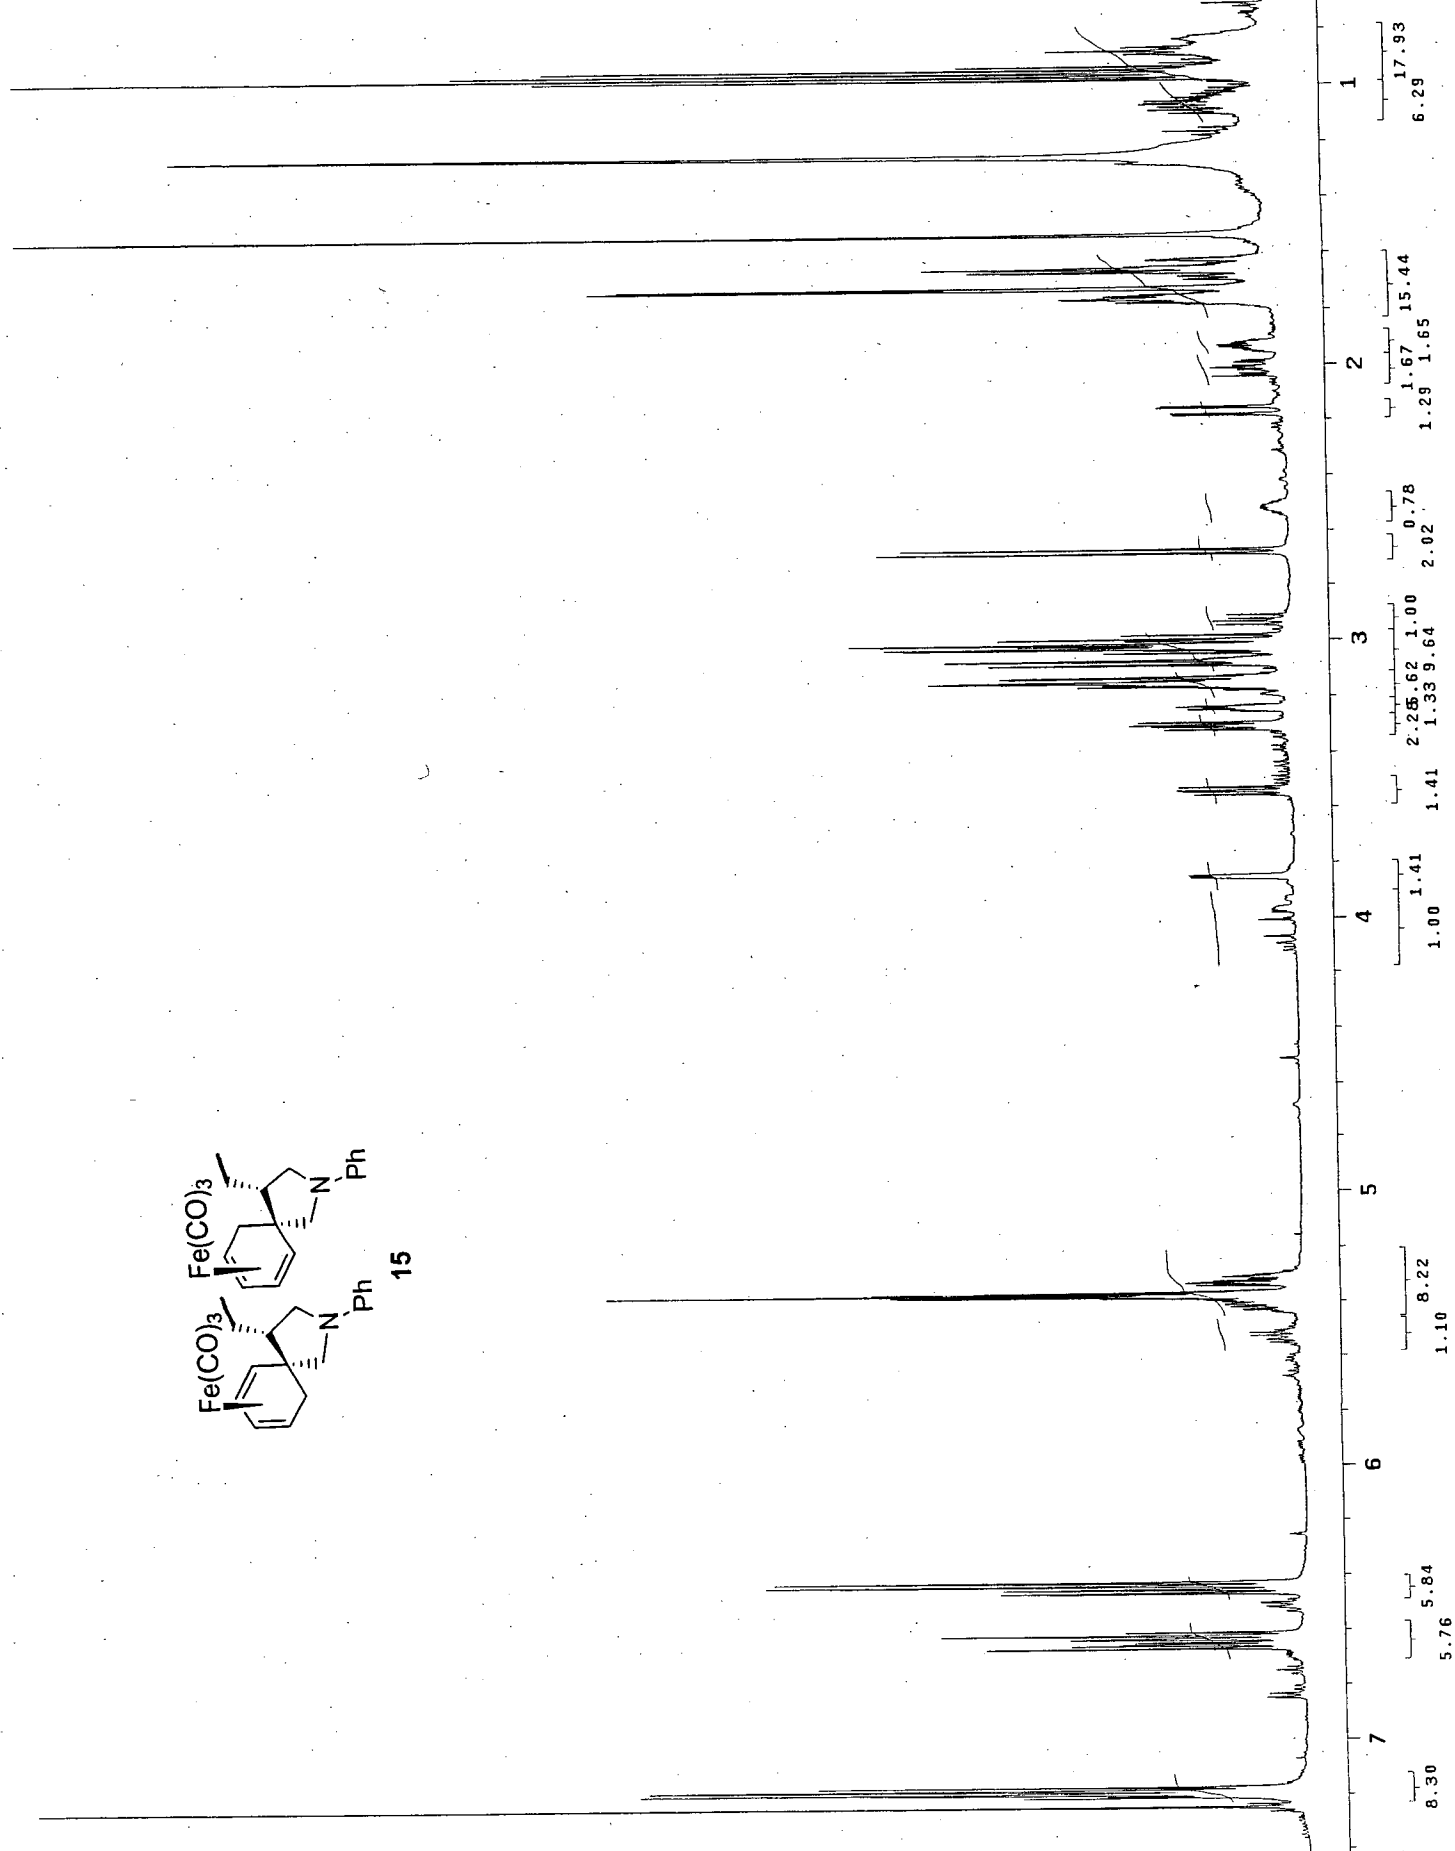



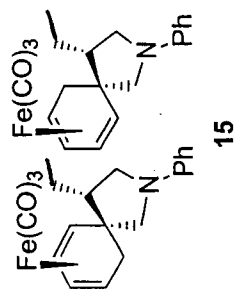

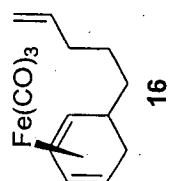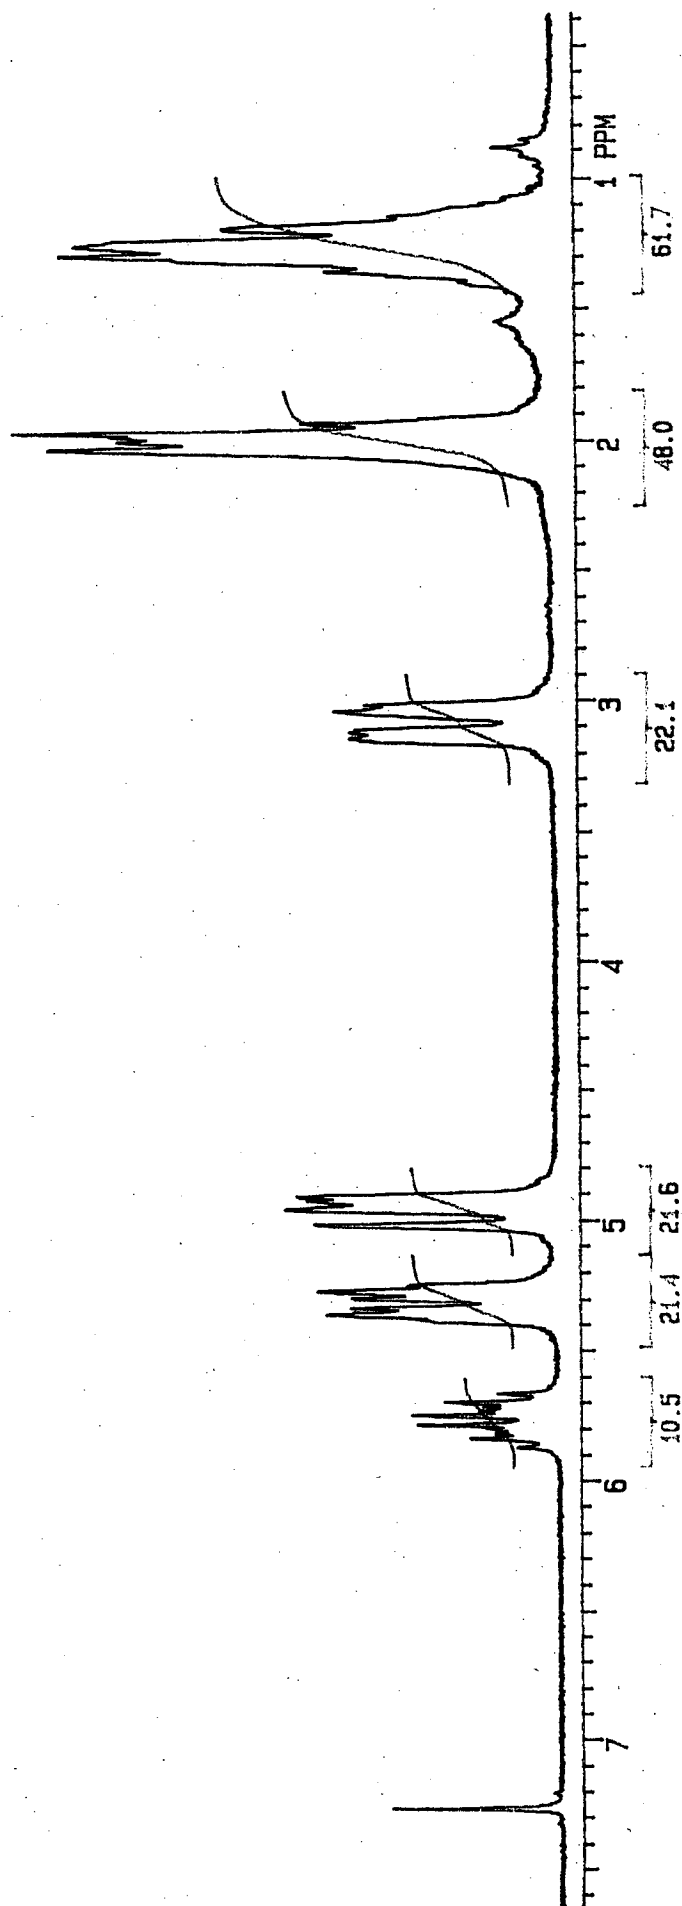

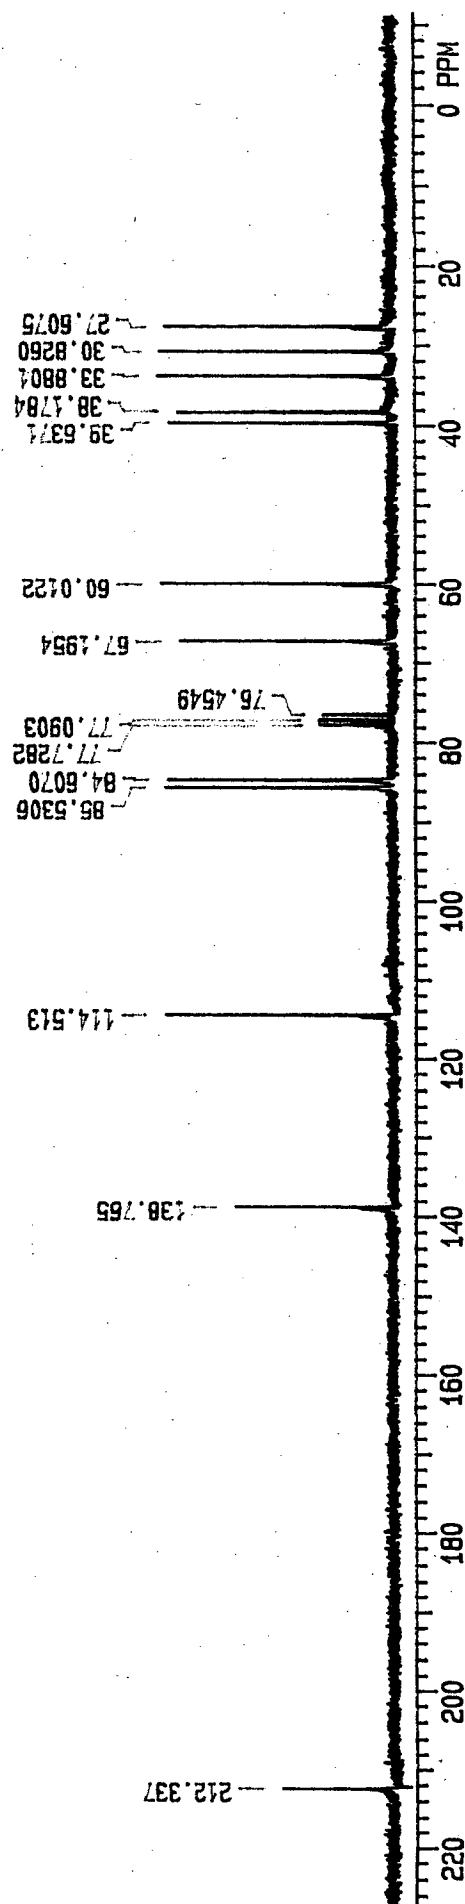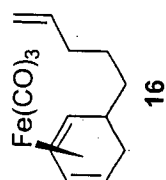

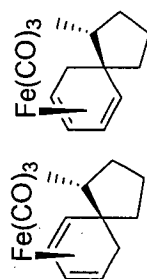

18

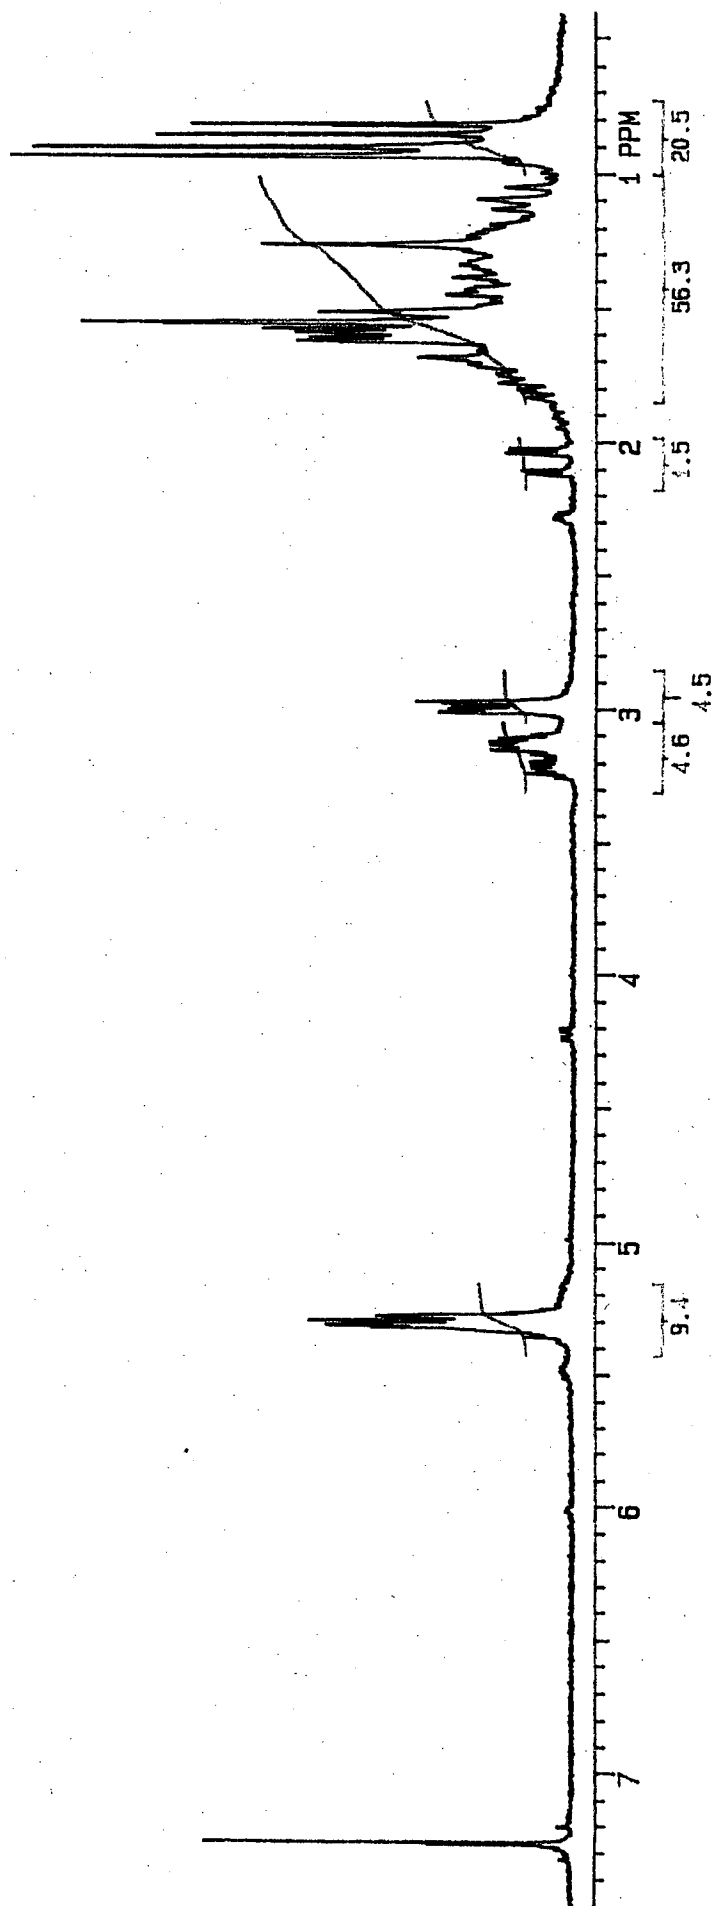

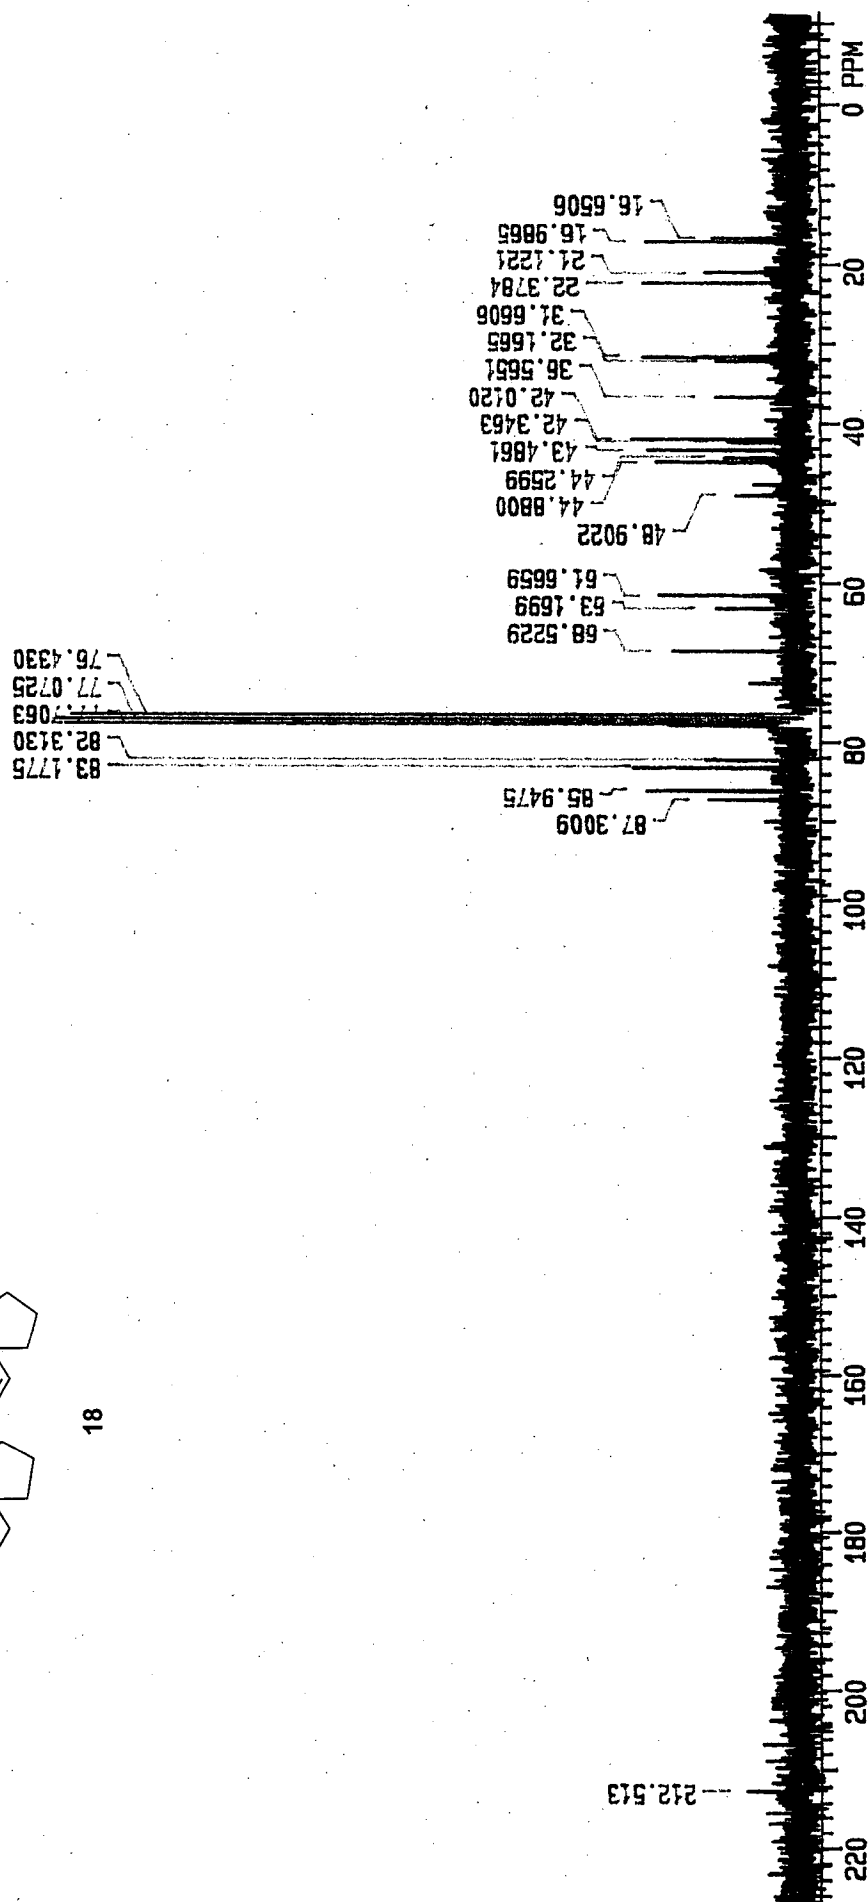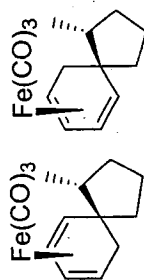

18

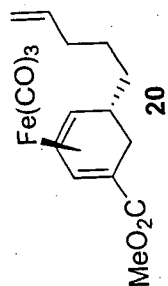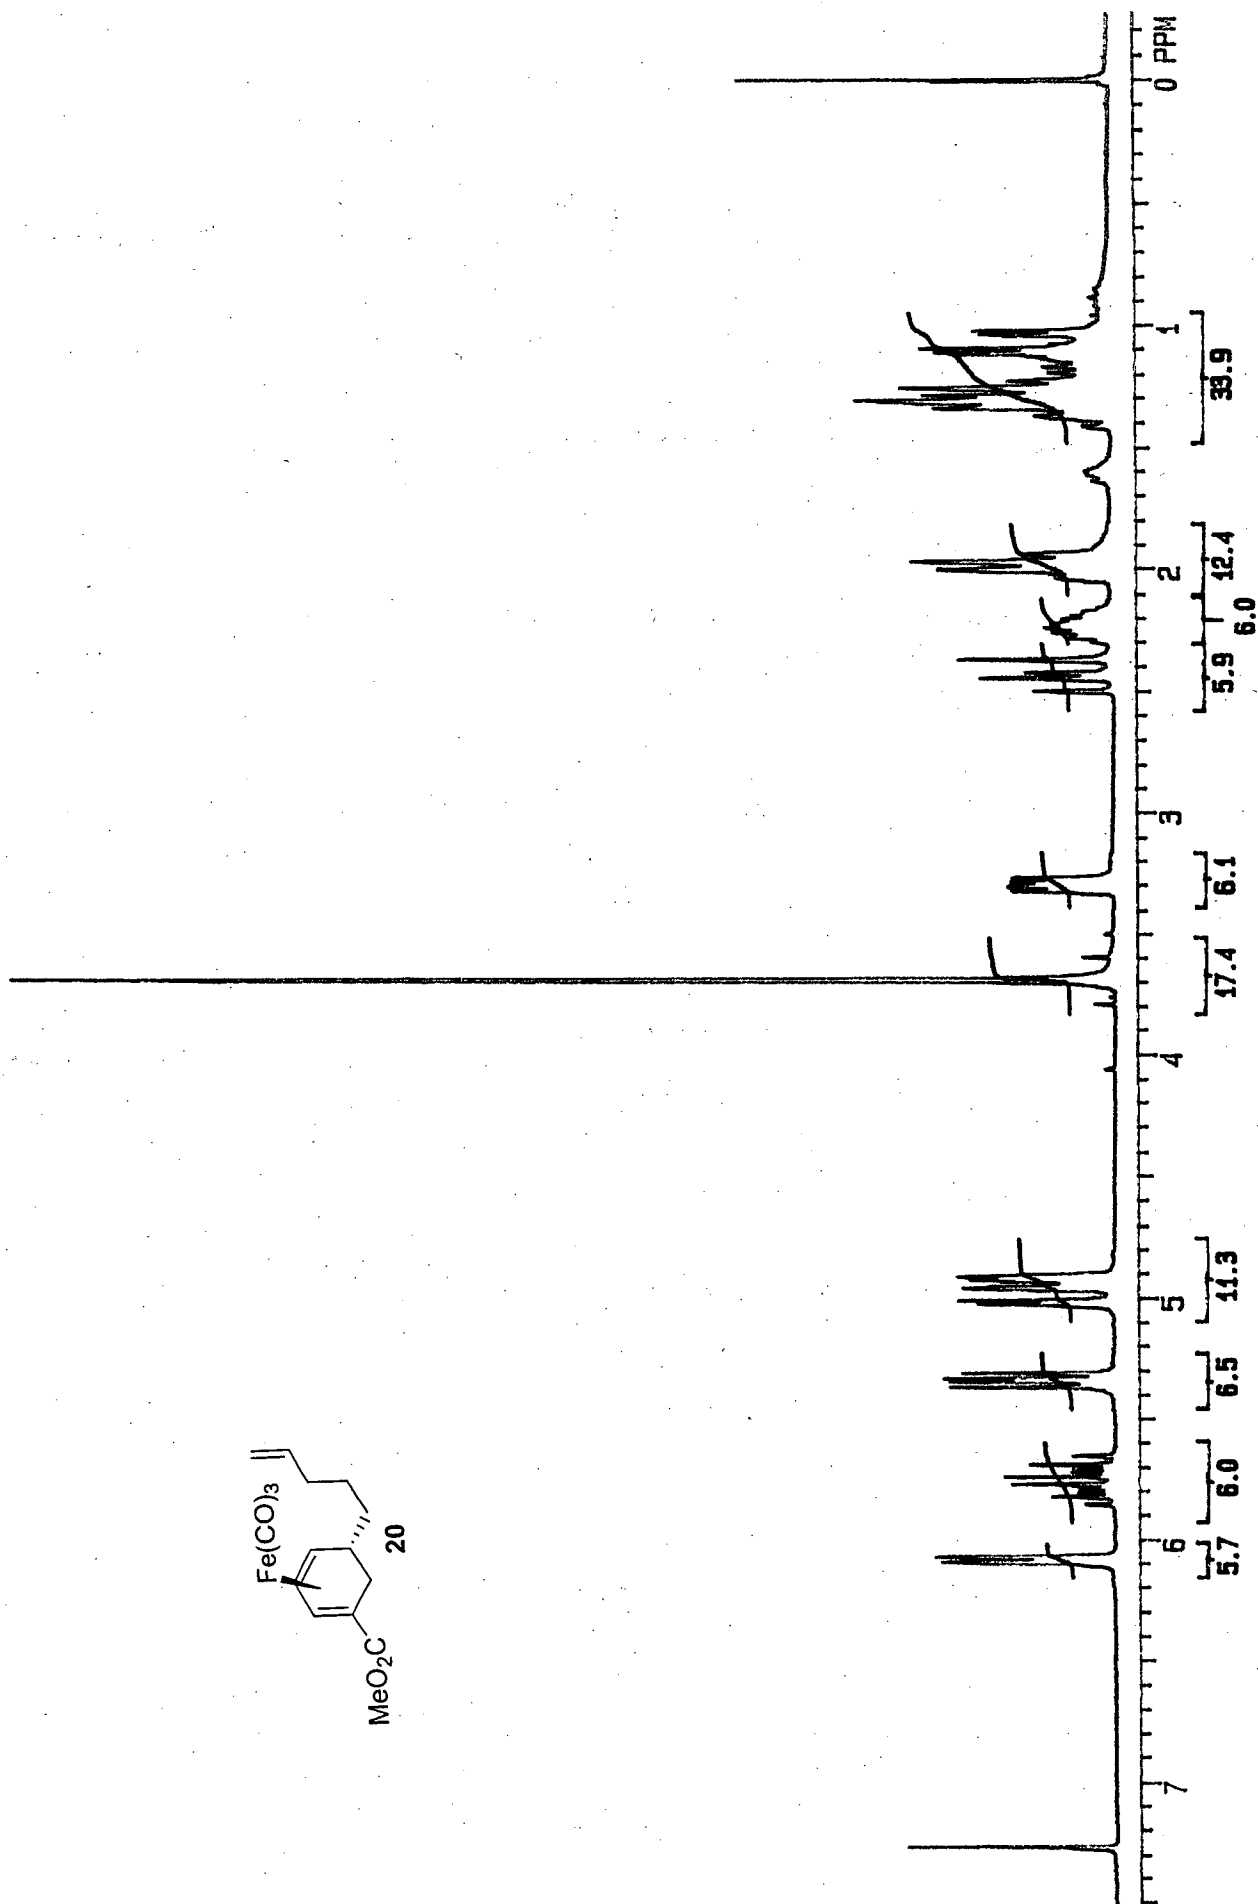

S39

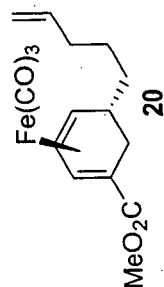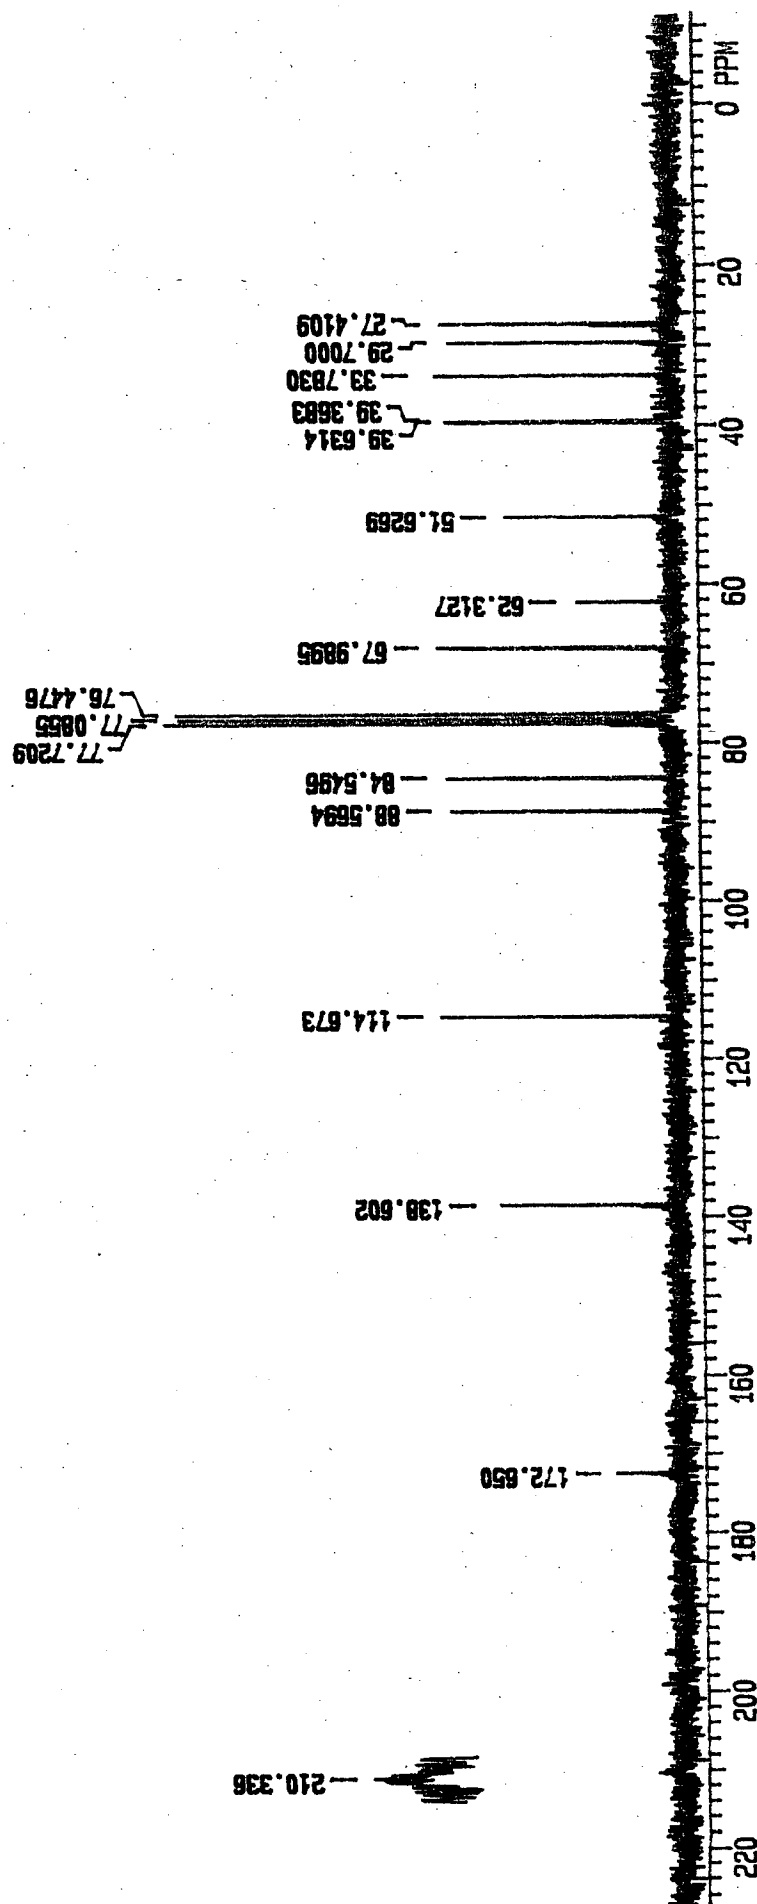

Archive directory: /export/home/pearson/vnmrSYS/data  
 Sample directory: wxtidcarbonyl\_26Jan2004  
 File: PROTON

Pulse Sequence: s2pul  
 Solvent: CDCl<sub>3</sub>  
 Temp. 25.0 C / 298.1 K  
 INOVA-600 "larry"

Relax. delay 1.000 sec  
 Pulse 45.0 degrees  
 Acq. time 3.494 sec  
 Width 6000.6 Hz  
 32 repetitions

OBSERVE H1, 599.9093321 MHz  
 DATA PROCESSING  
 FT size 65536  
 Total time 2 min, 24 sec

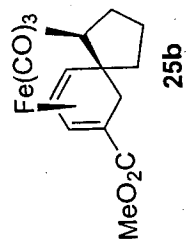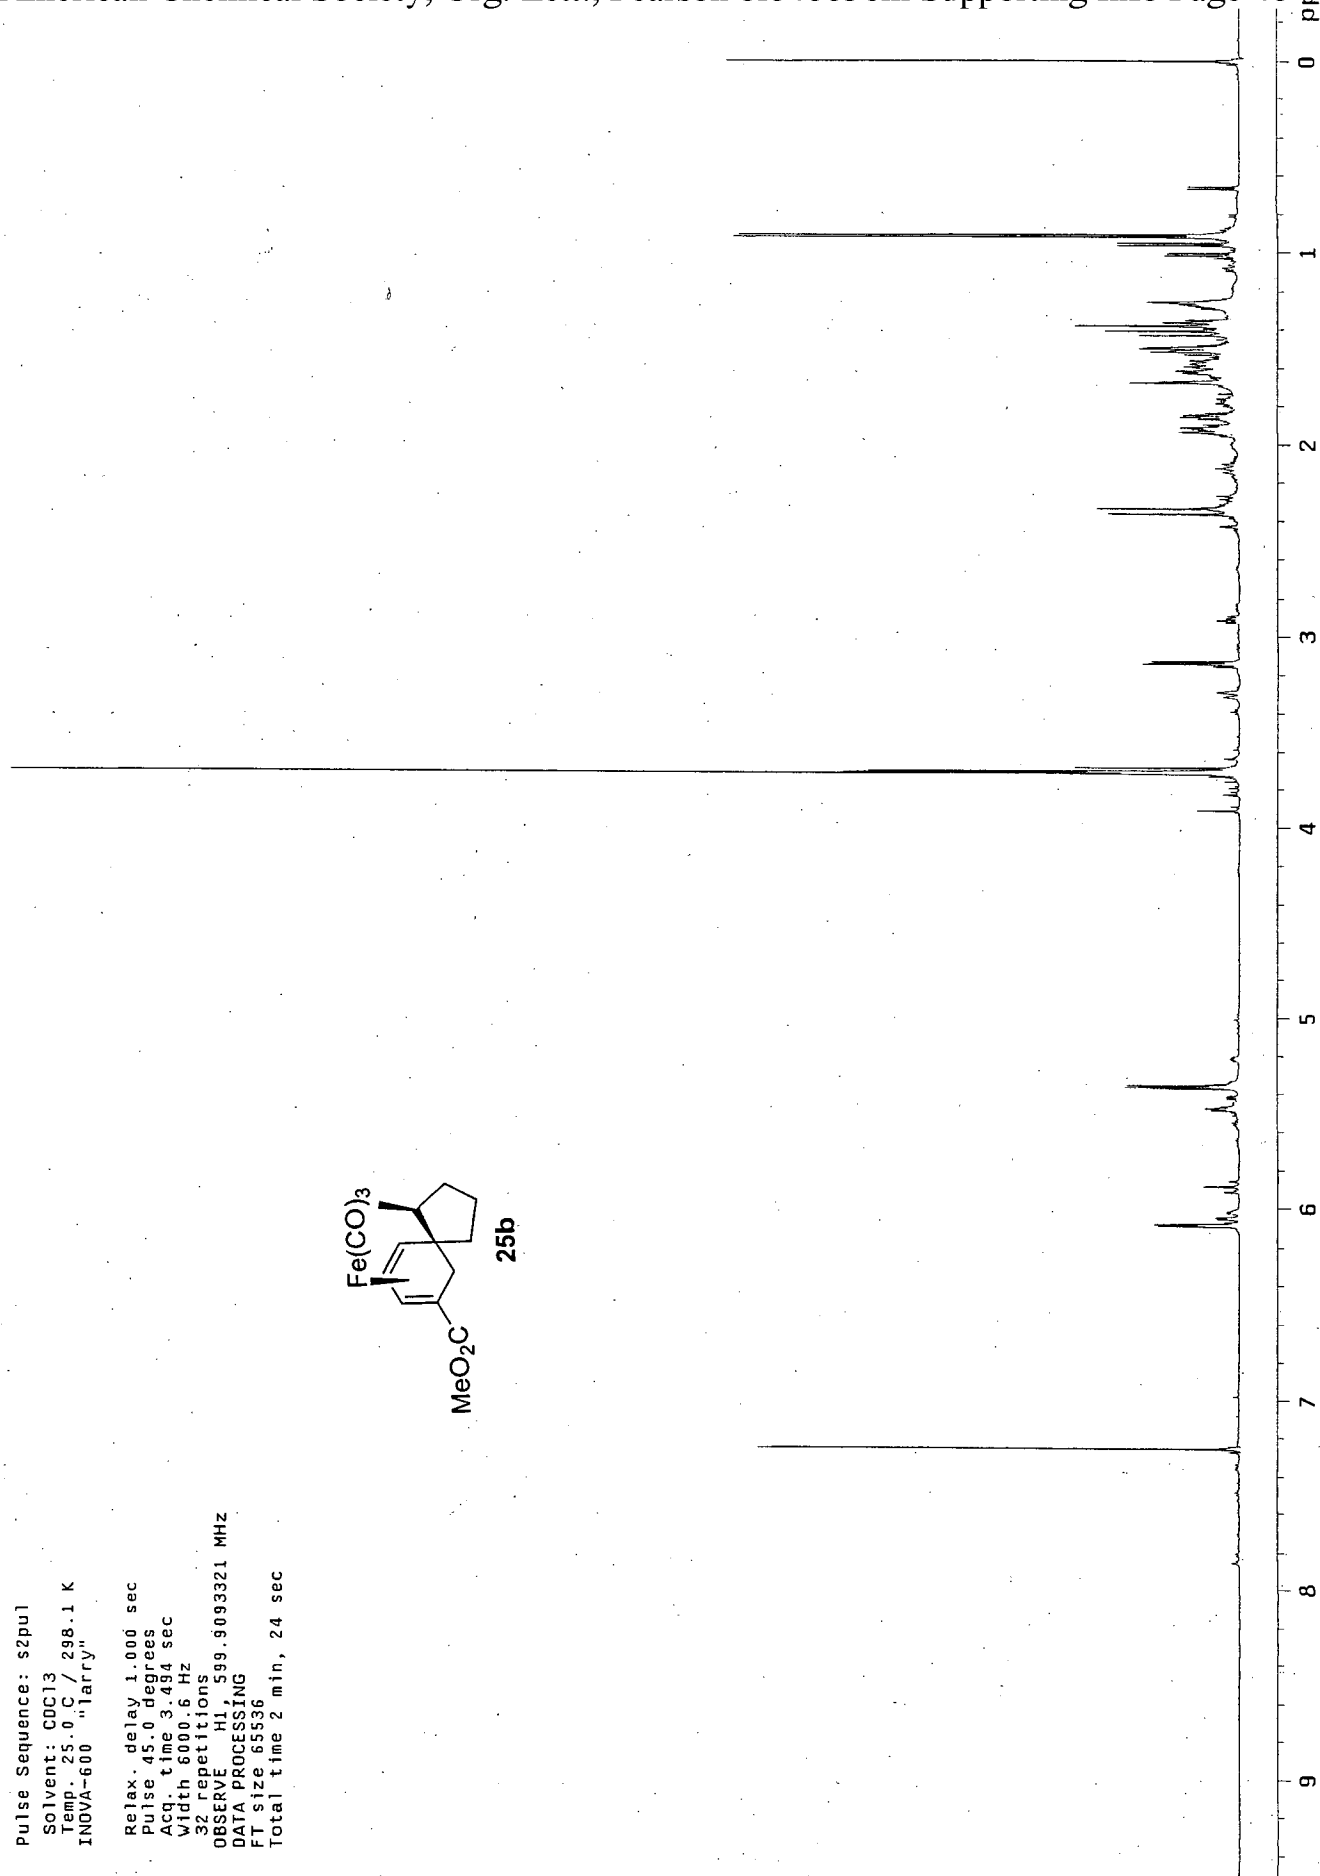

Supplement: Supplementary file 1 [file 5170585]
